# 1 Synergy and allostery in ligand binding by HIV-1 Nef

2

3 Abdullah Aldehaiman<sup>1</sup>, Afaque A. Momin<sup>1</sup>, Audrey Restouin<sup>2</sup>, Luyao Wang<sup>1</sup>, Xiaoli Shi<sup>3</sup>,  
4 Safia Aljedani<sup>1</sup>, Sandrine Opi<sup>2</sup>, Adrien Lugari<sup>4</sup>, Umar F. Shahul Hameed<sup>1</sup>, Luc Ponchon<sup>5</sup>,  
5 Xavier Morelli<sup>2</sup>, Mingdong Huang<sup>6</sup>, Christian Dumas<sup>7</sup>, Yves Collette<sup>2</sup>, Stefan T. Arold<sup>1,7\*</sup>

6

7

8 <sup>1</sup> King Abdullah University of Science and Technology (KAUST), Computational Bioscience  
9 Research Center (CBRC), Biological and Environmental Science and Engineering (BESE),  
10 Thuwal, 23955-6900, Saudi Arabia

11 <sup>2</sup> CRCM, CNRS, INSERM, Institut Paoli-Calmettes, Aix-Marseille Univ, 13009, Marseille,  
12 France.

13 <sup>3</sup> State Key Laboratory of Structural Chemistry, Fujian Institute of Research on the Structure  
14 of Matter, Chinese Academy of Sciences, 155 Yang Qiao Xi Lu, Fuzhou, Fujian 350002,  
15 China

16 <sup>4</sup> Sartorius Stedim FMT S.A.S, ZI Les Paluds - Avenue de Jouques, 13781 Aubagne Cedex,  
17 France

18 <sup>5</sup> Laboratoire CiTCoM, CNRS UMR 8038, Université de Paris, 4 Avenue de l'observatoire,  
19 75270 Paris, France

20 <sup>6</sup> National Local Joint Research Center on Biomedical Photodynamic Technology, Fuzhou  
21 University, 2 Wulong River North Blvd, Sunshine Building Rm 613S, Minhou District,  
22 Fuzhou, Fujian 350108, China

23 <sup>7</sup> Centre de Biochimie Structurale, CNRS, INSERM, Université de Montpellier, 34090  
24 Montpellier, France

25

26 \* Correspondence to STA: [stefan.arold@kaust.edu.sa](mailto:stefan.arold@kaust.edu.sa)

27

28

29 **Abstract**

30 The Nef protein of human and simian immunodeficiency viruses (HIV and SIV, respectively)  
31 boosts viral pathogenicity through its interactions with host cell proteins. Nef has a folded  
32 core domain and large flexible regions, each carrying several protein interaction sites. By  
33 combining the polyvalency intrinsic to unstructured regions with the binding selectivity and  
34 strength of a 3D folded domain, Nef can bind to many different host cell proteins, perturbing  
35 their cellular functions. For example, the combination of a linear proline-rich motif and a  
36 hydrophobic core domain surface allows Nef to increase affinity and selectivity for particular  
37 Src family SH3 domains. Here we investigated whether the interplay between Nef's flexible  
38 regions and its core domain can allosterically influence ligand selection. We found that the  
39 flexible regions can bind back to the core domain in different ways, producing distinct  
40 conformational states that alter the SH3 domain selectivity and availability of Nef's functional  
41 motifs. The resulting cross-talk might help synergising certain subsets of ligands while  
42 excluding others, promoting functionally coherent Nef-bound protein ensembles. Further, we  
43 combined proteomic and bioinformatic analyses to identify human proteins that select SH3  
44 domains in the same way as does Nef. We found that only 2–3% of clones from a whole  
45 human fetal library displayed a Nef-like SH3 selectivity. However, in most cases this  
46 selectivity appears to be achieved by a canonical linear interaction rather than a Nef-like  
47 'tertiary' interaction. This analysis suggests that Nef's SH3 recognition surface has no (or  
48 marginally few) cellular counterparts, validating the Nef tertiary binding surface as a  
49 promising unique drug target.

50

51 **Key words**

52 Tertiary recognition, auto-inhibition, 18-crown-6, selectivity, allostery, thermodynamics

53

## 54 Introduction

55 Nef is an accessory protein important for enhancing the virulence and pathogenesis of  
56 human and simian immunodeficiency viruses (HIV and SIV respectively) (1,2). The absence  
57 of a functional Nef protein results in HIV viruses that fail to cause AIDS in infected persons  
58 (3–6). Hence, Nef is considered a promising drug target.

59 Nef's role in disease progression results from its capacity to perturb several host cell  
60 functions. Nef alters the protein composition of the host cell surface, mostly by  
61 downregulating transmembrane proteins involved in immune signalling and viral entry  
62 (including CD3, CD4, CD8, CD28, CXCR4, CCR5, SERINC3, SERINC5 and antigen-loaded  
63 MHC-II) [reviewed in (7)]. However, Nef also upregulates the surface expression of other  
64 factors such as TNF, DC-SIGN and LIGHT (8,9). Other functions of Nef include the  
65 promotion of T cell activation (10,11) and lymphocyte chemotaxis (12). Nef also perturbs  
66 intracellular signalling, in particular through its interactions with cytoplasmic kinases  
67 (including members of the Src and Tec/Bt kinase families, PAK2, and the PI3 kinase) (13–  
68 18). Collectively, these actions promote immune evasion of infected cells as well as  
69 enhancement of viral release, spreading and infectivity.

70 Nef is a non-catalytic protein and all its effects are caused by its interactions with a  
71 multitude of cellular proteins. The molecular bases for a subset of these interactions have  
72 been determined. Initial NMR and crystallographic studies showed that Nef consists of a  
73 folded core domain (residues 71-206; herein we use the numbering of the LAI isolate unless  
74 stated otherwise), a myristoylated N-terminal flexible arm (residues 1-70) and a central core  
75 loop (residues 148-179)(**Fig 1A**) (19–23). Both the core domain and flexible regions contain  
76 important ligand binding sites (1,7).

77 Subsequent structural studies revealed the molecular determinants for Nef's capacity  
78 to perturb Src kinases by tightly interacting with their SH3 domains (20,22,24). In addition to  
79 its canonical 'linear' proline-rich motif P<sub>72</sub>xxPxR (where x is any amino acid), Nef uses an  
80 extended surface provided by its folded core to bind to Src family SH3 domains. The  
81 resulting 'tertiary' binding mode increases the interaction surface, and hence affinity and  
82 selectivity, compared to the canonical linear interaction between proline-rich motifs and SH3  
83 domains (1,20,22). One particular key residue from the SH3 domain, located in the arginine  
84 ('R') position of the so-called arginine-threonine (RT) loop (residue number 96 in Fyn), was  
85 shown to centrally affect the binding affinity by interacting with a pocket on the Nef core  
86 surface (25). This pocket is hydrophobic in HIV-1 Nef, and more polar/charged in SIV Nef.  
87 Consequently, HIV-1 Nef associates more tightly with kinases whose SH3 domain have a  
88 hydrophobic residue in the 'R' position, whereas SIV Nef prefers charged or polar residues  
89 (20,26). However, additional effects were noted, such as the extent of the stabilising  
90 hydrogen bond network of the SH3 RT loop (27). The RT loop needs to change  
91 conformation to adapt to the Nef tertiary surface, and hence a more extensive hydrogen  
92 bond network (such as seen in Fyn SH3) entails a higher enthalpic cost for binding than  
93 intrinsically more flexible RT loops (case of Hck). SH3 binding by Nef activates the Src family  
94 kinases Hck by outcompeting the intramolecular interactions that maintain the inactive  
95 'closed' kinase conformation (28,29). SH3-dependent activation by Nef was also observed  
96 for Lyn and c-Src in a *Saccharomyces cerevisiae* assay (30), but not in an *in vivo*  
97 transformation assay (31). The former assay also failed to show activation of Fgr, Fyn, Lck,  
98 or Yes by Nef. Hence, although a role of Nef-targeted kinases in HIV replication, infectivity,  
99 MHC-1 downregulation and pro-inflammatory vesicle release was observed (16,17,32,33),  
100 the molecular mechanism for it remains to be fully elucidated.

101           A series of structural studies also elucidated how Nef molecules hijack the host cell  
102 trafficking machinery by serving as an adaptor between AP1 and MHC-I molecules or  
103 between AP2 and CD4 (7,34–37). Akin to its interactions with Src family SH3 domains, Nef  
104 uses its core domain in addition to the linear recognition motifs (located on Nef's flexible  
105 regions) to firmly lock onto AP1 or AP2. And as for SH3 binding, Nef uses its proline-rich  
106 region to bind to AP1 and AP2. However, even though AP1 and AP2 binding involves also  
107 residues of the preceding flexible N-terminal arm, Nef binds these targets in very different  
108 ways. In case of AP1, Nef binds to the  $\mu$ 1 subunit, and part of the MHC-I cytoplasmic tail is  
109 sequestered in a groove formed between AP1 and Nef. Conversely, Nef binds to the AP2  
110  $\alpha$ 2,  $\beta$ 2 and  $\sigma$ 2 subunits. Moreover, Nef serves as an adaptor between CD4 and AP2, by  
111 using its E<sub>160</sub>xxxLL motif, located in the Nef core domain loop, as mimicry of acidic dileucine  
112 motifs of cellular AP2 cargos, while using a core-domain binding pocket to engage part of  
113 the CD4 cytoplasmic tail (34,37). However, despite these differences, the binding sites of  
114 CD4 and MHC-I on Nef partly overlap (37).

115           Collectively, these studies show that Nef's strong and polyvalent interactions result  
116 from the combination of (i) the multivalency intrinsic to flexible protein-protein interaction  
117 motifs and (ii) the increased specificity and affinity (due to an increased binding surface) of a  
118 3D folded domain. Nef's composition of 50% tertiary structure and 50% flexible regions  
119 constitutes an optimal structural framework for this strategy. However, the resulting high  
120 number of cellular targets of Nef, many of which remain structurally uncharacterised, raises  
121 the question if binding to one target affects the associations of Nef with other targets. More  
122 specifically, does Nef have evolved allosteric mechanisms for creating synergy between sets  
123 of ligands that contribute to the same cellular function while excluding others? Here, we  
124 combined structural and functional studies to identify cross-reactivity in selected intra- or  
125 intermolecular associations.

126  
127  
128

## 129 Results and discussion

130

### 131 The flexible regions of Nef have specific thermodynamic effects on SH3 132 binding

133 We designed several HIV-1 Nef constructs to assess the influence of the flexible regions for  
134 binding to SH3 domains. In addition to full-length LAI Nef, we prepared (i) a deletion of the  
135 N-terminal arm that still retained the W<sub>57</sub>L motif that was found to be implicated in CD4  
136 binding and that was seen in contact with the Nef hydrophobic pocket in an NMR study (19)  
137 (residues 56-205; WLΔN), (ii) a deletion of the N-terminal that lost the W57 and only retained  
138 L58 (residues 58-205; LΔN), (iii) a deletion of the N-terminal arm that has lost the WL motif  
139 (residues 60-205; ΔN), and (iv) a ΔN construct that had additionally a truncation of the core  
140 loop to eliminate its E<sub>160</sub>xxxLL endocytosis motif (residues 60-158;174-205; ΔNΔL), (**Fig 1A**).  
141 We also included full-length SF2 Nef to test the isolate-specificity of the effects. Compared to  
142 the LAI isolate, SF2 Nef has a four amino acid insertion in the N-terminal region and a T71R  
143 substitution that was shown to non-specifically enhance binding to Src family SH3 domains  
144 (28,38) (**Fig 1B**).

145 To test, in addition, the effect of the SH3 'R' residues on Nef binding, we included  
146 SH3 mutants that were engineered to have different side chains at this position. We used  
147 Fyn SH3 wild-type (where the 'R' position is a long and positively charged arginine, Fyn<sub>R96</sub>),  
148 and an Hck-like mutant where this position is substituted by a medium-sized hydrophobic  
149 isoleucine (Fyn<sub>R96I</sub>), and a *Rous sarcoma* virus v-Src like large and hydrophobic tryptophan  
150 (Fyn<sub>R96W</sub>) (**Fig 1C**).

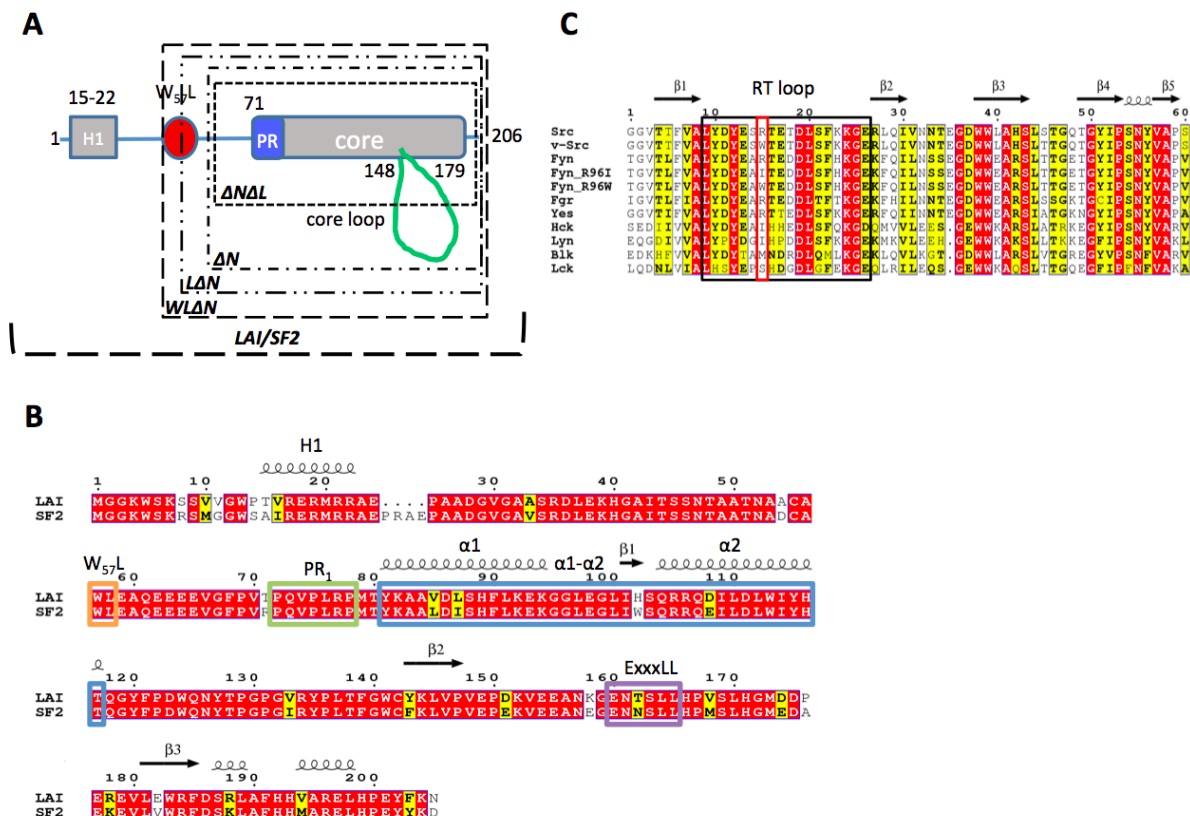

151

152 **Fig 1.** Schematic overview of the constructs used. **A)** Schematic drawing of Nef constructs used  
153 where key residues such as W<sub>57</sub>L and the proline rich region (PR, including the P<sub>72</sub>xxPxR motif), are  
154 shown. **B)** Sequence alignment between Nef LAI/SF2 where key motifs discussed in the paper are  
155 highlighted: H1 (brown), W<sub>57</sub>L (orange), PR (green), α1-α2 (blue), and E<sub>160</sub>xxxLL endocytosis motif

156 (purple). **C)** Sequence alignment of all SH3 domains discussed. The RT loop (black) and the 'R'  
 157 position within (red) are highlighted. In both sequence alignments, residues with similar physico-  
 158 chemical properties are written with black bold letters on yellow background. Conserved residues are  
 159 highlighted in red.

160  
 161

**Table 1. Influence of flexible regions on the thermodynamics of SH3 binding by Nef.**

| Nef : Fyn                                               | N               | Kd ( $\mu$ M)   | $\Delta$ G (kJ/mol) | $\Delta$ H (kJ/mol) | T $\Delta$ S (kJ/mol) |
|---------------------------------------------------------|-----------------|-----------------|---------------------|---------------------|-----------------------|
| $\Delta$ N $\Delta$ L : Fyn <sub>R96</sub> <sup>§</sup> | 1*              | 24.3 $\pm$ 15.0 | -26.3 $\pm$ 1.50    | -14.00 $\pm$ 10.0   | 12.33 $\pm$ 10.0      |
| $\Delta$ N $\Delta$ L : Fyn <sub>R96I</sub>             | 0.97 $\pm$ 0.10 | 3.86 $\pm$ 0.60 | -31.0 $\pm$ 0.40    | -34.0 $\pm$ 5.67    | -3.02 $\pm$ 5.56      |
| $\Delta$ N $\Delta$ L : Fyn <sub>R96W</sub>             | 0.98 $\pm$ 0.04 | 0.78 $\pm$ 0.22 | -34.9 $\pm$ 0.76    | -46.7 $\pm$ 3.70    | -11.8 $\pm$ 2.94      |
| $\Delta$ N : Fyn <sub>R96</sub> <sup>§</sup>            | 1*              | 83.3 $\pm$ 15.0 | -23.3 $\pm$ 1.50    | -34.3 $\pm$ 10.0    | -11.0 $\pm$ 10.0      |
| $\Delta$ N : Fyn <sub>R96I</sub>                        | 0.87 $\pm$ 0.03 | 5.06 $\pm$ 0.96 | -30.3 $\pm$ 0.47    | -39.7 $\pm$ 0.34    | -9.40 $\pm$ 0.73      |
| $\Delta$ N : Fyn <sub>R96W</sub>                        | 0.90 $\pm$ 0.02 | 1.28 $\pm$ 0.45 | -33.7 $\pm$ 0.88    | -56.5 $\pm$ 8.68    | -22.7 $\pm$ 9.56      |
| WL $\Delta$ N : Fyn <sub>R96</sub> <sup>§</sup>         | 1*              | 50.8 $\pm$ 15.0 | -24.5 $\pm$ 1.50    | -14.2 $\pm$ 10.0    | 10.3 $\pm$ 10.0       |
| WL $\Delta$ N : Fyn <sub>R96I</sub>                     | 1.01 $\pm$ 0.05 | 7.55 $\pm$ 1.57 | -29.3 $\pm$ 0.54    | -21.5 $\pm$ 2.18    | 7.77 $\pm$ 2.71       |
| WL $\Delta$ N : Fyn <sub>R96W</sub>                     | 0.94 $\pm$ 0.04 | 1.45 $\pm$ 0.40 | -33.4 $\pm$ 0.76    | -29.3 $\pm$ 0.37    | 4.16 $\pm$ 0.52       |
| LAI : Fyn <sub>R96</sub>                                | 1*              | 58.5 $\pm$ 8.44 | -24.2 $\pm$ 0.68    | -45.9 $\pm$ 10.5    | -21.7 $\pm$ 10.8      |
| LAI : Fyn <sub>R96I</sub>                               | 0.93 $\pm$ 0.01 | 0.79 $\pm$ 0.08 | -34.9 $\pm$ 0.23    | -40.7 $\pm$ 1.07    | -5.80 $\pm$ 1.30      |
| LAI : Fyn <sub>R96W</sub>                               | 0.96 $\pm$ 0.02 | 1.43 $\pm$ 0.10 | -33.4 $\pm$ 0.15    | -50.0 $\pm$ 1.29    | -16.6 $\pm$ 1.41      |
| SF2 : Fyn <sub>R96</sub>                                | 1*              | 28.7 $\pm$ 8.72 | -26.1 $\pm$ 0.76    | -59.2 $\pm$ 10.3    | -33.2 $\pm$ 11.01     |
| SF2 : Fyn <sub>R96I</sub>                               | 0.98 $\pm$ 0.04 | 0.02 $\pm$ 0.00 | -43.5 $\pm$ 0.07    | -77.2 $\pm$ 5.68    | -33.7 $\pm$ 5.75      |
| SF2 : Fyn <sub>R96W</sub>                               | 0.91 $\pm$ 0.03 | 0.12 $\pm$ 0.03 | -39.5 $\pm$ 0.58    | -56.6 $\pm$ 6.00    | -17.1 $\pm$ 5.58      |

162 Isothermal titration calorimetry data were established at 25 °C by titrating Fyn SH3 domains from the  
 163 syringe onto Nef in the measurement cell (see Methods). Values given are mean  $\pm$  SD, n=3, except  
 164 for the following two cases: \*, the C-value of the titration was too low to establish N, and N has been  
 165 fixed to 1 based on the known Nef : SH3 stoichiometry; §, Due to low heats and low C-values,  
 166 instrument-provided errors appeared underestimating the real uncertainty of the data analysis. Given  
 167 errors were estimated based on observed variations in data analysis. ITC data are shown in (S1 Fig).

168

169 Using isothermal titration calorimetry (ITC), we measured the thermodynamic  
 170 parameters of the three SH3 variants to different Nef constructs (Table 1). As expected, our  
 171 ITC data showed a 1:1 binding event with the hydrophobic substitutes Fyn<sub>R96I</sub> and Fyn<sub>R96W</sub>  
 172 displaying markedly better affinities than Fyn<sub>R96</sub>. However, our titration series provided  
 173 additional insights:

174 (i) Consistently across the LAI titrations, the thermodynamics of binding of Fyn<sub>R96I</sub>  
 175 were similar to those of Fyn<sub>R96W</sub>, with however Fyn<sub>R96W</sub> having a more favourable enthalpy  
 176 ( $\Delta$ H) and less favourable entropy ( $\Delta$ S) contributions. Hydrophobic interactions are normally  
 177 providing a positive contribution to  $\Delta$ S. Hence, the generally less favourable  $\Delta$ S contribution  
 178 of the most hydrophobic 'R' mutant Fyn<sub>R96W</sub> was unexpected and suggested that additional  
 179 factors influenced the binding.

180 (ii) Truncated Nef constructs bound ~fourfold stronger to Fyn<sub>R96W</sub> than to Fyn<sub>R96I</sub>.  
 181 Conversely, both full-length Nef, LAI and SF2, associated significantly tighter with Fyn<sub>R96I</sub>  
 182 than with Fyn<sub>R96W</sub>. SF2 Nef displayed a higher affinity for all SH3 variants than full LAI Nef,  
 183 which, in turn bound Fyn<sub>R96I</sub> better than its truncation variants. Due to the low affinity of the  
 184 Fyn<sub>R96</sub> SH3 domain, our measurements did not allow us to detect precise changes between  
 185 truncated and full-length LAI, but can rule out that gross affinity changes occurred. These

186 observations suggested that the N-terminal residues 1-59 affected the affinity of SH3 binding  
187 specifically with respect to the stereochemical nature of the 'R' position.

188 (iii) Fyn<sub>R96</sub> bound ~tenfold weaker to the truncated LAI constructs than FynR96I. This  
189 difference to the next best SH3 variant increased in full-length Nefs to 50-fold (LAI) and 200-  
190 fold (SF2). Although precise thermodynamic parameters could not be established for Fyn<sub>R96</sub>  
191 due to the low C-values of the Fyn<sub>R96</sub> binding curves, this observation suggested that the  
192 presence of the N-terminal segment augmented the level of discrimination between Fyn<sub>R96</sub>  
193 and the other two variants.

194 (iv) WLΔN produced significantly different thermodynamics than the other LAI  
195 titrations. WLΔN showed both favourable ΔH and ΔS, whereas in the other LAI titrations  
196 (containing more or less flexible regions) a ~twofold more favourable ΔH compensated for  
197 an unfavourable ΔS contribution. This anomaly suggested that the W<sub>57</sub>L dipeptide promotes  
198 a particular thermodynamic contribution to SH3 binding, that disappears once the full N-  
199 terminal segment is present.

200

### 201 **The presence of SH3 domains influences binding of the N-terminal Nef helix**

202 Our ITC data suggested that the presence of the N-terminal 59 Nef residues can influence  
203 the association with SH3 domains. This Nef region contains an amphipathic helix (termed  
204 here H1, residues 15-22 in LAI, **Fig 1A**) that helps to anchor Nef to charged lipid headgroups  
205 (23). In some structural studies of full-length Nef, this H1 helix was observed to bind back to  
206 the hydrophobic groove formed by the core helices α1 and α2 and the connecting residues  
207 (herein, we refer to this region as the α1-α2 groove)(PDB ids 6cri, 4en2, 6cm9). This α1-α2  
208 groove is adjacent to, but not overlapping with, the SH3 binding site (35,36).

209 We synthesized a Nef fragment containing H1 (residues 8-26) and tested its affinity  
210 for the various Nef constructs, in the absence or presence of the SH3 Fyn<sub>R96I</sub> and Fyn<sub>R96W</sub>  
211 variants. To assure that most Nef was bound to the SH3 domain, we used 50 μM  
212 (approximately 10 x  $K_d$ ) as a concentration for the SH3 domains. We did not include the  
213 Fyn<sub>R96</sub> SH3 here, because its low affinity precluded us from reaching 10 x  $K_d$  in this  
214 experiment.

215 Using MST, we observed a low affinity of  $K_d$  ~300 μM for H1 binding to the core  
216 domain-only Nef ΔNΔL. The presence of additional flexible regions further decreased this  
217 affinity: The core-loop containing Nef ΔN bound H1 with a  $K_d$  of 700 μM, Nef WLΔN bound  
218 H1 with  $K_d$  > 1 mM and full-length LAI and SF2 did not show binding at all. We also noted  
219 that the presence of either Fyn<sub>R96I</sub> or Fyn<sub>R96W</sub> SH3 domains increased the affinity for Nef  
220 ΔNΔL and ΔN ~twofold (**Fig 2A-F, S1 Table**). However, WLΔN only displayed a clear  
221 twofold increase in presence of Fyn<sub>R96I</sub>, and both full-length Nefs failed to show an increase  
222 in H1 binding for either of the SH3 domains. Moreover, we also found that the incubation of  
223 ΔNΔL with H1 significantly increased its affinity for Fyn<sub>R96I</sub> (**Fig 2G, S1 Table**).

224 Collectively, these data demonstrated that the presence of SH3 domains can  
225 enhance the association of H1 with the hydrophobic α1-α2 groove next to the SH3 binding  
226 site and *vice versa*. However, the presence of flexible Nef regions decreased binding of H1.  
227 The absence of H1 binding to full-length Nefs can be explained by the H1 sequence  
228 contained in the full-length Nefs out-competing the H1 peptide. Moreover, the W<sub>57</sub>L motif  
229 was found back-binding to the α1-α2 groove in the apo Nef NMR structure (2nef; (19)),  
230 explaining its competition with H1. However, competition with the core loop alone was  
231 unexpected and suggested that the core loop also loosely associates with the same Nef  
232 region.

233 A previous NMR study observed that the presence of the Hck SH3 domain (with an  
234 isoleucine in the 'R' position) enhanced the affinity of Nef for a peptide encompassing the  
235 CD4 di-leucine motif by a factor of two (from  $K_d \sim 1$  mM to  $\sim 500$   $\mu$ M) (39). We attempted to  
236 reproduce these data using MST and our Nef constructs (with or without SH3 domains).  
237 However, the CD4 affinities were below the detection limit of our MST assay in all cases (**S2**  
238 **Fig**).

239 To probe whether this non-specific synergy also existed between SH3 domains and  
240 other Nef ligands, we tested the association between Nef and the C-terminal fragment of the  
241 p85 subunit of the PI3 kinase. The C-terminal region encompassing the inter-SH2 coiled-coil  
242 domain (iSH2) was previously shown to bind to HIV-1 SF2 Nef in cellular studies (40–42).  
243 However, the structural basis of this association is currently unknown. We observed binding  
244 of our LAI and SF2 Nef constructs to the p85 nSH2-iSH2-cSH2 fragment (nicSH2) with  $K_d$ s  
245 in the 10s - 100  $\mu$ M range (**Fig 2H-K, S1 Table**). We noted a trend of slightly decreasing  
246 affinity with the increasing length of the flexible regions, and of a slightly negative impact of  
247 the presence of R96I/W SH3 domains on the nicSH2 affinity. Although the low affinities and  
248 hence measurement uncertainties precluded us from obtaining precise affinities, we could  
249 conclude that the presence of the SH3 domains did only have neglectable effects in our  
250 assay and did not notably increase binding between Nef and p85 nicSH2.

251 In summary, our data established that SH3 binding to Nef (in particular Fyn<sub>R96I</sub>)  
252 enhanced the association of H1 to the hydrophobic  $\alpha 1$ - $\alpha 2$  groove of Nef. In turn, binding of  
253 H1 to the  $\alpha 1$ - $\alpha 2$  groove also enhanced that affinity of an SH3 domain to Nef. The  $\alpha 1$ - $\alpha 2$   
254 groove is located next to the SH3 binding site but does not overlap with it. Hence, binding of  
255 one ligand to one site appears to allosterically stabilise the binding site of the other ligand.  
256 Such a stabilisation could be, for example, through paying the entropic penalty of going from  
257 the free to bound state. However, SH3 binding did not enhance the association of at least one  
258 other ligand, the p85 C-terminal region, showing that the affinity-enhancing effect of SH3  
259 domains does not cover all Nef associations. Further, our observation that the Nef core loop  
260 and W<sub>57</sub>L motif can compete with the H1 motif suggested that these flexible regions can  
261 loosely associate with the Nef hydrophobic groove in absence of the H1 helix.



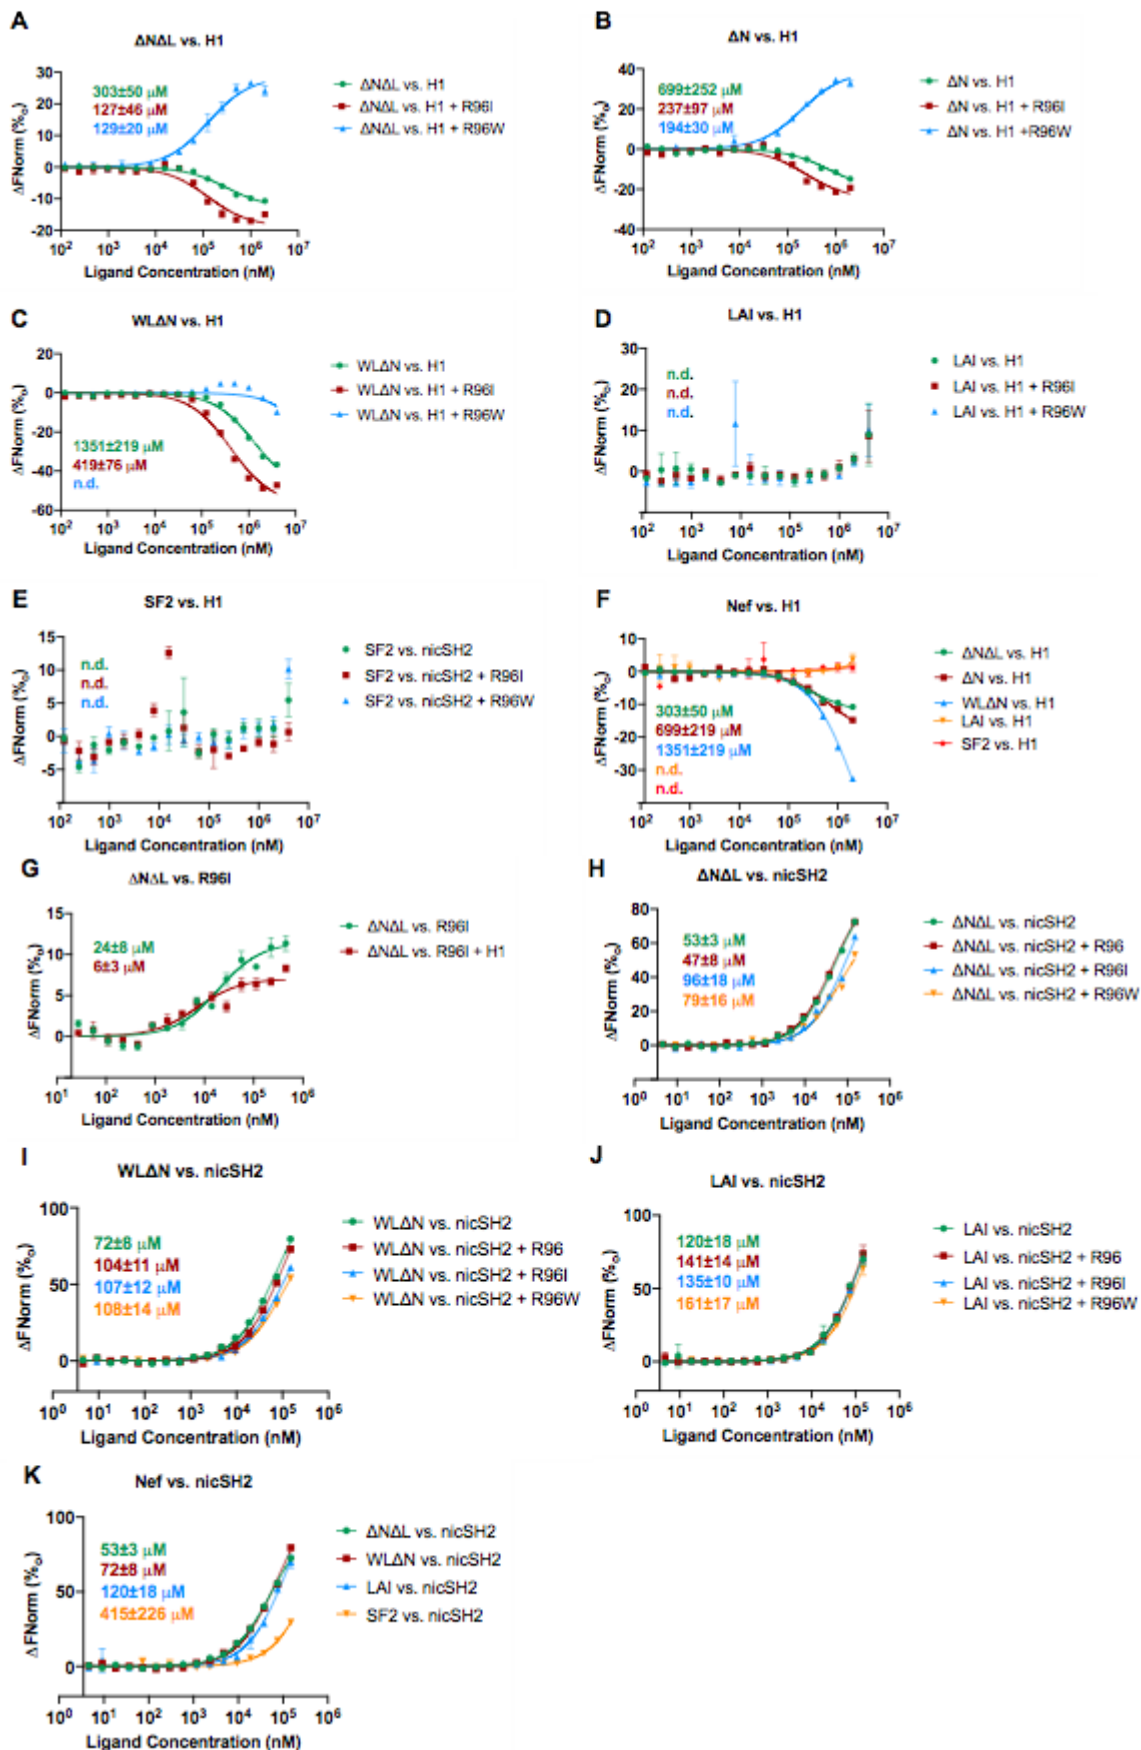

262

263

264

265

266

**Fig 2.** Influence of Nef's flexible regions on inter- and intramolecular interactions. MST data were collected at room temperature. Nef was labeled and used at a fixed concentration of 10-50 nM. 50  $\mu M$  SH3 domains were mixed with labelled Nef before adding the H1 or  $nicSH2$ .

267  
268  
269  
270  
271  
272  
273  
274  
275  
276  
277  
278  
279  
280  
281  
282  
283  
284  
285  
286  
287  
288  
289  
290  
291  
292  
293  
294  
295  
296  
297  
298  
299  
300  
301  
302  
303  
304  
305  
306

## **Establishing the structural data for the binding features of SH3 domain variants**

To identify the structural basis underlying the observed Nef : SH3 binding characteristics, we wanted to compare apo and Nef-bound structures for all three Fyn SH3 domains, Fyn<sub>R96</sub>, Fyn<sub>R96I</sub>, and Fyn<sub>R96W</sub>, as well as for Hck SH3. Available crystal structures used either an equivalent of the WLΔN Nef construct (an N-terminal truncation retaining the W<sub>57</sub>L motif), or the LΔN Nef construct which is missing W57 but contains L58. The following crystal structures were available: WLΔN:Fyn<sub>R96I</sub> (1EFN (20)), LΔN:Fyn<sub>R96</sub> (PDB id 1AVZ (22)), LΔN bound to the Hck SH2-SH3 fragment (4U5W, (24)), and the apo structures of Fyn<sub>R96</sub> (1SHF, (43)) and Hck SH3 (1BU1, (27)). To obtain the missing structural data, we determined seven additional crystal structures, namely full-length SF2 Nef bound to Fyn<sub>R96I</sub>, of LΔN bound to Fyn<sub>R96W</sub> and several structures of unliganded Fyn<sub>R96I</sub> and Fyn<sub>R96W</sub> (**S2-S4 Tables**). Additionally, we ran triplicate 200 ns molecular dynamics (MD) simulations of Nef in different free and SH3-bound states (both based on the same WLΔN:Fyn<sub>R96I</sub> complex taken from 1EFN) (**Supplemental Methods and Data**).

## **SH3 binding decreases the dynamics of specific Nef regions**

Our interaction assays showed that binding of the SH3 domain increased the affinity of Nef for H1 and vice versa, suggesting an allosteric cooperativity. To rationalize this observation, we carried out MD simulations comparing apo-WLΔN Nef (here denoted Nef-A) with Fyn<sub>R96I</sub> complexed with WLΔN Nef (Nef-C). We noted that Nef-C had a lower calculated van der Waals and electrostatic energy, and showed decreased overall mobility compared to Nef-A (root mean square fluctuations, RMSF were  $2.52 \pm 1.88$  Å for Nef-A and  $2.16 \pm 1.32$  Å for Nef-C) (**Fig 3A-D**), **Supplemental Methods and Data**), indicating that the SH3 domain stabilised and rigidified Nef. The RMSF differences were greatest in the residues of the N-terminal arm and the core domain loop (**Fig 3B**). Within the core domain, the residues 75 to 80 showed strongest stabilisation upon SH3 binding, as expected from direct interaction with the SH3 domain (**Fig 3B,E**). This stabilisation extended to the underlying residues 111 to 126, including the C-terminal part of the  $\alpha$ 2 helix. Additionally, Nef residues 101 to 102 and residue 138 fluctuate less in the SH3 domain complex (**Fig 3F,G**). Hence, the SH3 domain stabilised a large part of the H1 binding site and a region that interacts with CD4 (37) and contributes to Nef:Nef crystal contacts (observed in PDB 1EFN, 1AVV, 1AVZ, 4USW, 3REA, 3D8D), and possibly to dimerisation *in vitro* (44) (**Fig 3A**). Together these results suggested that SH3 binding selectively decreases the dynamics of Nef regions involved in protein-protein interactions.

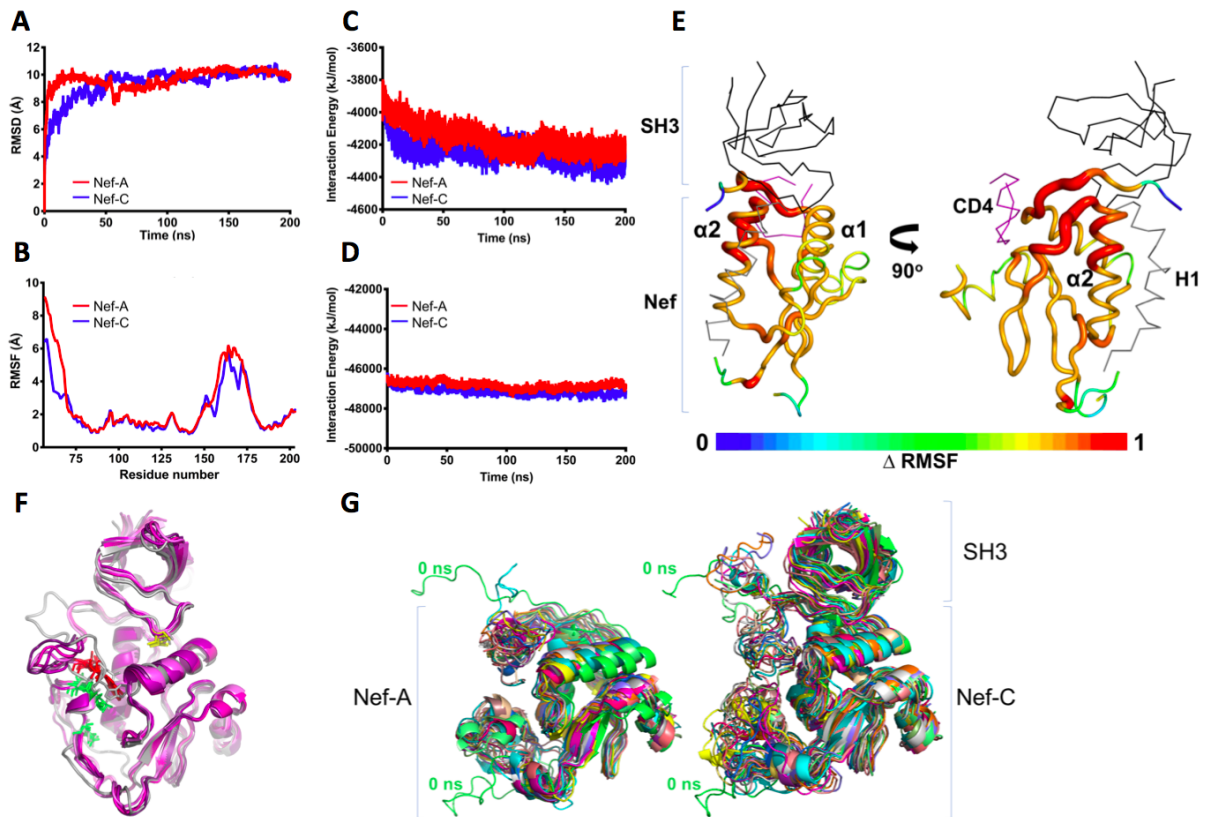

307

308 **Fig 3. A)** Average C $\alpha$  RMSD values as a function of time for Nef-A and Nef-C. **B)** Average C $\alpha$ RMSF

309 values vs residue numbers for Nef-A and Nef-C. **C)** Average Lennard-Jones and **D)** Coulombic

310 components of the interaction energy monitored over time in Nef-A and Nef-C. **E)** B-factors showing

311  $\Delta$ RMSF between Nef-A and Nef-C from 50-200 ns on the 3D structure. The gradient scale shows

312 least fluctuating regions in blue and more fluctuating regions in red. SH3 domain is shown in black,

313 CD4 is shown in magenta and H1 is shown in gray. **F)** Residual electron density in 1EFN was used to

314 propose a speculative model for concerted back-binding of W<sub>57</sub>L (red) and E<sub>160</sub>XXXLL (green) into the

315  $\alpha$ 1- $\alpha$ 2 groove. The initial model (grey) is superimposed onto structures obtained in MD simulations at

316 170 - 200 ns (coloured magenta to dark magenta). I96 is highlighted in yellow. **G) (Left)**

317 Representative snapshots of every 10 ns for the 3D structure of Nef-apo and **(Right)** 3D structure of

318 Nef:SH3 complex. Nef-A and Nef-C used for structural analysis using molecular dynamics are marked

319 showing stable conformation over the course of simulation.

320

321 **Sequential associations of the flexible regions with the hydrophobic Nef  $\alpha$ 1- $\alpha$ 2**

322 **groove**

323 Our ITC data showed a clear difference in thermodynamic signature for SH3 domains

324 association with Nef WL $\Delta$ N as compared to the other LAI fragments. Furthermore, our MST

325 data showed that the association of H1 is increasingly hampered by the presence of the core

326 loop, by the W<sub>57</sub>L motif, and by the additional presence of the N-terminal residues 1-56.

327 Given that H1 binds to the  $\alpha$ 1- $\alpha$ 2 groove, the competition with H1 suggested that the core

328 loop and the W<sub>57</sub>L motif also loosely associated with the  $\alpha$ 1- $\alpha$ 2 groove.

329 Indeed, the hydrophobic  $\alpha$ 1- $\alpha$ 2 groove was found occupied by intramolecular protein

330 regions in previous structural analyses. In solution NMR studies of a truncated apo-Nef

331 (equivalent to Nef WL $\Delta$ N plus a deletion of the di-Leu endocytosis motif, as in our  $\Delta$ N $\Delta$ L

332 mutant), W57 from the N-terminal extension was found to bind back to the  $\alpha$ 1- $\alpha$ 2 groove

333 (2NEF; (19)). W<sub>57</sub>L was also associated with the  $\alpha$ 1- $\alpha$ 2 groove in a crystal structure of SF2  
334 Nef bound to an engineered high-affinity SH3 domain (3REA), but in a different structural  
335 arrangement (45). In crystallographic studies of the core domains of HIV-1 and SIV Nef, the  
336  $\alpha$ 1- $\alpha$ 2 groove was found occupied by hydrophobic residues of a helical endocytosis motif  
337 situated in a long loop emerging from the Nef core domain of an adjacent molecule in the  
338 crystal lattice (SIV: 5NUH, 5NUI; HIV: 3RBB). However, the positions of the endocytosis  
339 motifs in HIV and SIV Nef in these crystals were different (46,47). Also, none of the core loop  
340 motifs was found associated with the Nef core domain *in cis*.

341 Upon reinspection of the LAI Nef<sub>T71R</sub> WL $\Delta$ N structure bound to Fyn<sub>R96I</sub> (1EFN), we  
342 found strong and continuous residual density in the  $\alpha$ 1- $\alpha$ 2 groove in both Fyn<sub>R96I</sub>-bound Nef  
343 molecules of the asymmetric unit (**S3 Fig**). In both molecules of the asymmetric unit, the  
344 electron density region closest to the position of W57 in the NMR model provides a good fit  
345 for a tryptophan side chain while the adjacent density fits a leucine, suggesting that this is  
346 the location of the W<sub>57</sub>L motif (**S3 Fig**). Assuming this position, the remaining density cannot  
347 be attributed to the residues of the N-terminal region between W57 and T71, and might  
348 correspond to the extremity of the core loop. Thus, we speculate that in the WL-containing  
349 Nef forms, the WL motif and the core loop might jointly occupy the  $\alpha$ 1- $\alpha$ 2 groove, with the  
350 WL motif directly interacting with the core loop, and stabilising it. A model for such a 'closed'  
351 form, built based on residual electron density in 1EFN, was stable in molecular dynamics  
352 runs supporting that this conformation is stereochemically possible (**S3 Fig**).

353 In LAI Nef  $\Delta$ N:SH3 complexes crystallized in the same space group (PDB ID 1AVZ  
354 and 4D8D, with Fyn<sub>R96</sub> or Fyn<sub>R96W</sub>, respectively), this electron density is replaced by water  
355 molecules in both Nef of the asymmetric unit (**S3 Fig**), suggesting that the W<sub>57</sub>L motif was at  
356 least in part responsible for the observed unattributed electron density. A W<sub>57</sub>L-stabilised  
357 association of the core loop is also supported by a relative protection of this region from  
358 hydrogen exchange (48). Additionally, in our MD simulations, we noted a clear tendency of  
359 the WL $\Delta$ N Nef core loop and N-terminal arm (residues 57-71) to go from their extended  
360 conformations of the initial model towards a 'closed' conformation where they approach the  
361  $\alpha$ 1- $\alpha$ 2 groove as the simulation proceeded (**Fig 3A**). Hence, our simulations suggested a  
362 tendency of these flexible residues to regroup towards the  $\alpha$ 1- $\alpha$ 2 groove.

363 In combination, these observations propose a model to rationalise our ITC and MST  
364 data. In this model, the core loop alone and the W<sub>57</sub>L motif alone only associate very loosely  
365 and dynamically with the  $\alpha$ 1- $\alpha$ 2 groove. When both regions are jointly available, this  
366 association becomes more pronounced. However, both are outcompeted by H1 (when  
367 tethered to the core). Further support for the capacity of H1 to outcompete other  
368 intramolecular regions comes from our survey of available experimental models (6CRI,  
369 4EN2, 6CM9) (**S4 Table**). This survey showed that whenever the H1 motif is present in Nef,  
370 it occupies the  $\alpha$ 1- $\alpha$ 2 groove instead of W57 or the core loop. In the low-resolution crystal  
371 structure of full-length LAI bound to Fyn<sub>R96I</sub> that we determined the  $\alpha$ 1- $\alpha$ 2 groove was partly  
372 occluded by adjacent molecules in the crystal lattice, further supporting that also the H1:core  
373 association is of low affinity only and can be displaced easily.

374

### 375 **The Fyn<sub>R96W</sub> mutation alters the SH3 RT loop hydrogen-bond network**

376 In our ITC titrations, we observed that increasing the hydrophobicity of the SH3 'R' position  
377 from isoleucine to tryptophan resulted in a less favourable entropy contribution, suggesting  
378 that the incorporation of the tryptophan caused additional loss of degrees of freedom upon  
379 binding (**Table 1**). Therefore, we compared the RT loop features of our apo-Fyn<sub>R96W</sub> crystal

380 structure with those of the free states of Fyn<sub>R96</sub>, Fyn<sub>R96I</sub> and of Hck SH3. We observed that  
 381 the apo Fyn<sub>R96</sub> and Fyn<sub>R96I</sub> structures had a similar strong RT loop–rigidifying network of six  
 382 hydrogen bonds (**Fig 4**). Conversely, the NH group of the Fyn W96 disrupts the RT loop  
 383 hydrogen bond network, producing an RT-loop that is less stabilised by hydrogen bonds in  
 384 the free state, and hence more flexible. Consequently, the Fyn<sub>R96W</sub> variant loses more  
 385 entropy upon fixation of the RT loop in the Nef interface than does Fyn<sub>R96I</sub>, explaining the  
 386 less favourable entropy contribution to binding of Fyn<sub>R96W</sub>. The poorly stabilised RT loop of  
 387 Fyn<sub>R96W</sub> is akin to the one of Hck SH3, and Hck SH3 was previously shown to also have a  
 388 less favourable enthalpy contribution to LAI Nef ΔN binding compared to other SH3  
 389 domains, including Fyn<sub>R96</sub> (27). Conversely, fewer hydrogen bonds need to be broken in  
 390 Fyn<sub>R96W</sub> upon Nef binding, than in Fyn<sub>R96I</sub> or Fyn<sub>R96</sub>, Fyn<sub>R96W</sub>, explaining the observed greater  
 391 favourable enthalpy contribution of Fyn<sub>R96W</sub>.  
 392  
 393

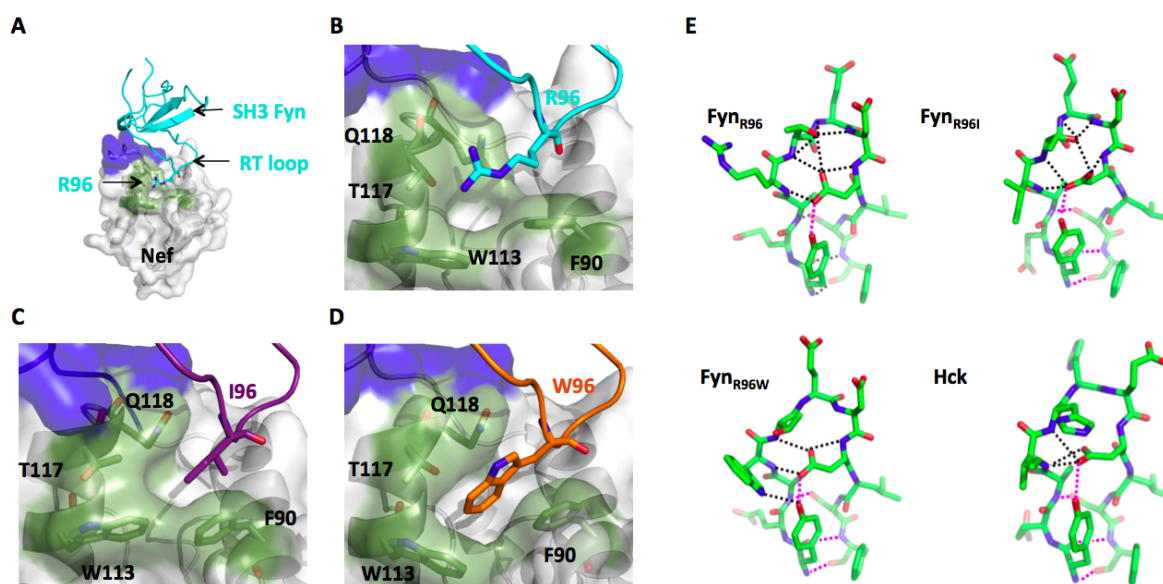

394  
 395 **Fig 4.** Crystal structures of the Nef core:Fyn SH3 complexes (left) and of the SH3 domain RT loop  
 396 (right) are shown. The Nef P<sub>72</sub>xxPxR (blue) and tertiary regions (green) are shown on the Nef  
 397 surface. **A**). Global view of the ΔN:Fyn<sub>R96</sub> SH3 complex (PDB 1AVZ). **B-D**) Expanded views of the  
 398 tertiary interaction between SH3 residue 96 and the cognate Nef core pocket. (B) ΔN:Fyn<sub>R96</sub> (1AVZ),  
 399 **C**) WLΔN:Fyn<sub>R96I</sub> (1EFN), and **D**) ΔN:Fyn<sub>R96W</sub> (4D8D). **E**): RT loop hydrogen bond network of  
 400 unliganded SH3 domains. Hydrogen bonds are indicated by dotted lines. Those shown in dark black  
 401 need to be broken upon binding to Nef core. Hydrogen bonds shown in magenta are preserved in the  
 402 Nef core:SH3 complex. For Hck SH3, preserved and broken hydrogen bonds were evaluated from a  
 403 computationally docked ΔN:Hck SH3 complex (22). Fyn<sub>R96W</sub> SH3, but not Fyn<sub>R96I</sub> SH3, shows a Hck  
 404 SH3-like reduced RT loop hydrogen bond network. PDB accession numbers are Hck:1BU1;  
 405 Fyn<sub>R96</sub>:1SHF; Fyn<sub>R96I</sub>: 3H0I and 6IPY; Fyn<sub>R96W</sub>: 6IPZ.  
 406

#### 407 **The Nef H1 helix selectively favours short-chain ‘R’ positions.**

408 Our binding studies suggested that the presence of the Nef N-terminal H1 helix has specific  
 409 effects on SH3 domain binding: The presence of H1 increased binding of Fyn<sub>R96I</sub> markedly  
 410 more than Fyn<sub>R96W</sub>, while not having significant effects on Fyn<sub>R96</sub>. Our comparison of all  
 411 available Nef:SH3 complexes revealed some flexibility of the relative orientation of the SH3  
 412 domains with respect to Nef, much of it can be attributed to crystallographic lattice contacts

413 (see **Supplemental Methods and Data** and **S3 Fig**). However, the position of SH3 'R'-  
414 position residue relative to Nef, and the canonical P<sub>72</sub>xxPxR:SH3 interactions are overall well  
415 conserved (**Fig 5A**). Maintaining these key interactions is mainly possible because of the  
416 flexibility of the Nef P<sub>72</sub>xxPxR motif region which can buffer for positional differences  
417 compared to the rest of the Nef core. Within this context, we selected Nef:SH3 complexes  
418 that appeared unperturbed by the crystallographic lattice, and inspected the interaction  
419 between the 'R' position and the underlying Nef hydrophobic pocket.

420 The SH3 'R' position interacts with the side chains of Nef residues W113 and F90.  
421 These side chains have been termed the 'gatekeeper' (47), because they separate the SH3  
422 binding surface of Nef with the hydrophobic  $\alpha$ 1- $\alpha$ 2 groove located between helices  $\alpha$ 1 and  $\alpha$ 2  
423 of the Nef core domain. It is this groove that was observed binding to H1 and CD4 in  
424 previous structural studies. Hence, a change of the gatekeeper residue side-chain position  
425 as a result of their interaction with the SH3 domain will also necessarily affect the shape and  
426 size of the hydrophobic groove. Thus, the 'R' position of the SH3 domain could influence  
427 ligand interactions of the hydrophobic  $\alpha$ 1- $\alpha$ 2 groove.

428 We noted that the side-chain position of W113, and to a lesser extent of F90,  
429 changes in response to the different SH3 orientations and to the different residues in position  
430 'R'. In cases where 'R' position is an isoleucine (Hck and Fyn<sub>R96I</sub>), W113 is rotated towards  
431 the SH3 domain, away from the hydrophobic crevice, as compared to apo Nef (**Fig 5B**).  
432 Conversely, in Fyn<sub>R96W</sub> structures, W113 is pushed into the hydrophobic groove, whereas  
433 W113 adopts an 'apo' side-chain orientation in the FynR96 complex. Thus, Binding to SH3  
434 domains with an isoleucine in position 'R' slightly increases the adjacent  $\alpha$ 1- $\alpha$ 2 groove,  
435 whereas a tryptophan decreases the groove and an arginine leaves it relatively unchanged.

436 We then superimposed the available experimental structures of HIV-1 Nef bound to  
437 its N-terminal H1 (EM: PDB ids 6cm9, 6cri; X-ray diffraction: 4en2) with the Nef:SH3 domain  
438 complexes. In the Nef:H1 structures, the N-terminal part of H1 loosely invades the Nef  
439 region that is occupied by the 'R' position in the Nef:SH3 complexes, clashing much more  
440 with 'R' positions being a tryptophan or arginine than with an isoleucine. The more stably  
441 helical rest of H1 fills the  $\alpha$ 1- $\alpha$ 2 groove. In this position, especially V16 and W13 of H1 are in  
442 close contact with W113 (**Fig 5C,D**). Again, an inward oriented Nef W113 (as observed in  
443 complexes with Fyn<sub>R96I</sub> and Hck) would leave sufficient space for H1, while the outward  
444 pointing W113 (as seen in Fyn<sub>R96W</sub> complexes) would produce (mild) clashes. From these  
445 analyses we conclude that the selective preference of an isoleucine in the 'R' position over  
446 an arginine or tryptophan can be explained by the direct and indirect (through the  
447 gatekeeper) impact of the H1 backbinding to the Nef core. Given that these clashes are  
448 minor, we propose that the overall affinity-enhancing effect of the N-terminal extension  
449 results from its (general) Nef-stabilising effect that is convoluted with the (specific) affinity-  
450 modulating effect on the 'R' position of the SH3 domain. This model can explain why full-  
451 length Nefs discriminate stronger between Fyn<sub>R96</sub> and the other two SH3 variants, and reach  
452 their highest affinity for Fyn<sub>R96I</sub>. The additional difference between the SH3 affinities of LAI  
453 and SF2 Nef is expected to arise from the T71R substitution in SF2 Nef, that adds an  
454 additional hydrogen bond to the SH3 interaction. Indeed, in our SF2 Nef:Fyn<sub>R96I</sub> crystal  
455 structure, did not show clear evidence for additional interactions between the flexible regions  
456 and the SH3 domain. However, the H1 region of SF2 Nef is characterised by the duplication  
457 of the RAEP motif situated at the C-terminus of H1, and even though this motif is not  
458 predicted to contribute to the intramolecular association, we cannot rule out that it has subtle  
459 effects on the interaction.

460

461

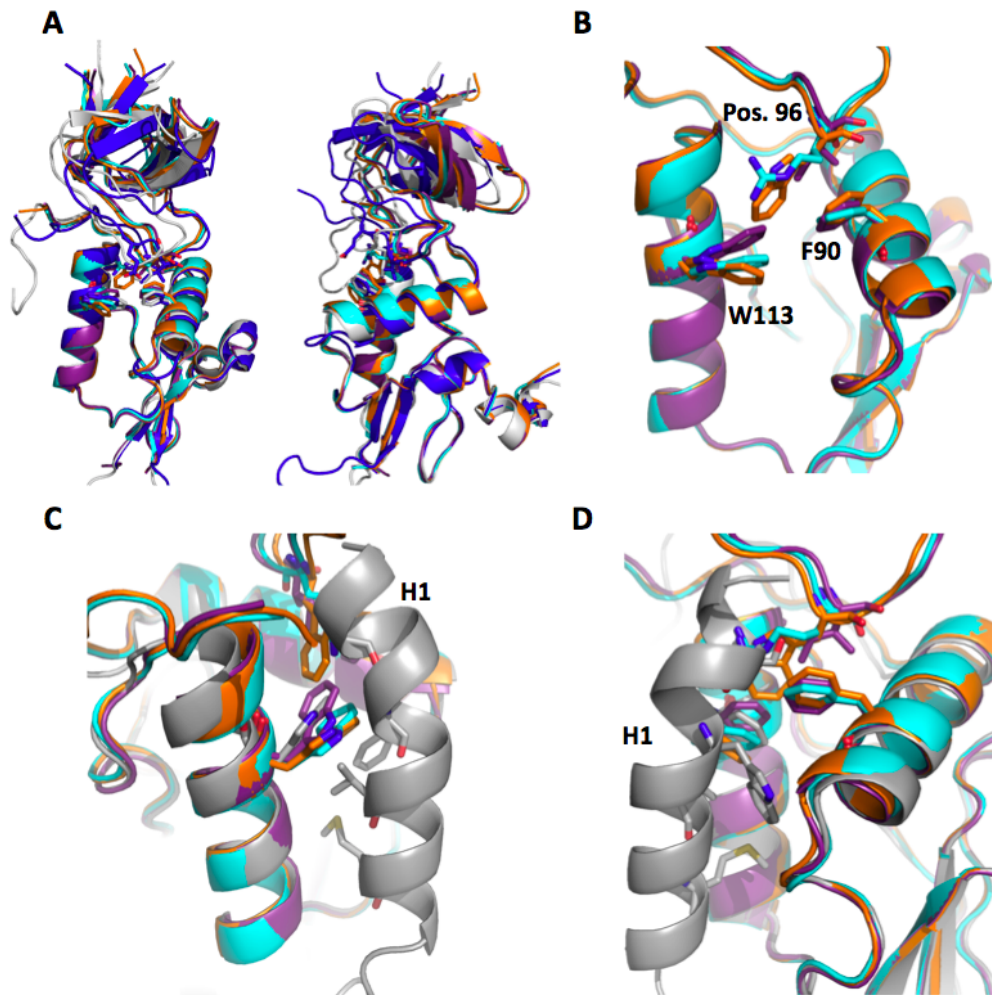

462

463 **Fig 5. A)** Superimposed Nef structures (1AVZ; cyan)(1efn; violet purple)(4D8D; orange)(3RBB;  
464 white)(4U5W; dark blue). **B)** Overlay of Nef LAI “gatekeeper” residues W113/F90 in relation to SH3  
465 position 96 complexes showing Nef bound to Fyn<sub>R96</sub> (1AVZ; cyan), Fyn<sub>R96I</sub> (1EFN; violet purple) and  
466 Fyn<sub>R96W</sub> (4D8D; orange). **C-D)** Overlap of Nef LAI “gatekeeper” residues bound to H1 (4EN2; grey).  
467

#### 468 **Assessing the prevalence of Nef-like SH3 selectivity based on Fyn<sub>R96</sub>**

469 Together with previous work, our analysis of the ‘tertiary’ association between an SH3  
470 domain and Nef demonstrated that the combination between a linear interaction motif and  
471 the folded core domain can create opportunities for synergy and allostery, in addition to  
472 enhancing affinity and selectivity. Therefore, we wanted to assess the occurrence of a Nef-  
473 like binding mode within cellular proteins. As a high-throughput compatible proxy for this  
474 binding mode, we chose to select cellular proteins that were able to distinguish between an  
475 isoleucine and an arginine in the ‘R’ position of Src family SH3 domains. Hence, we used the  
476 Hck SH3, Fyn<sub>R96</sub> SH3, and Fyn<sub>R96I</sub> SH3 domains as bait for a yeast two hybrid (Y2H)  
477 analysis. First, co-transformation of cells with Nef resulted in β-galactosidase production and  
478 yeast colony outgrowth on medium lacking uracil for Hck and Fyn<sub>R96I</sub> as baits but not for  
479 Fyn<sub>R96</sub> (**Fig 6A**). These results were confirmed using the LacZ and HIS3 reporters for  
480 Nef:Hck and Nef:Fyn<sub>R96</sub> (because Fyn<sub>R96I</sub> alone was able to transactivate the lacz and HIS3  
481 reporters, Fyn<sub>R96I</sub> could not be used with these reporter systems). In contrast to Nef, the Src-  
482 associated in mitosis 68 kDa (SAM68) protein interacted with comparable strength with

483 every SH3 domain (**Fig 6A**), indicating that the architecture of the SAM68 binding site  
484 cannot produce a Nef-like SH3 selection of the RT-loop amino acid position 96.

485 To identify selective cellular binding partners for the Hck, Fyn<sub>R96</sub>, and Fyn<sub>R96I</sub> SH3  
486 domains, we performed Y2H screens using a human fetal library (**Fig 6A**). Interactions  
487 between these SH3 domains and cloned cDNA fragments were assessed by expression of  
488 the URA3 selection/reporter gene. Because sometimes a bait can spontaneously become a  
489 self-activator, all positive clones isolated were retested by gap repair (**Fig 6** and **Materials**  
490 **and Methods**). We used the gap repair step to screen for the ability of each clone to interact  
491 with each SH3 domain. To test for a Nef-like differential association, we performed two  
492 coupled serial screens. An initial screen, using the human Hck or Fyn<sub>R96I</sub> SH3 domain as a  
493 bait, yielded, after gap repair, 422 and 100 clones, respectively (**S5,6 Tables**). The  
494 corresponding clones were included in a secondary screen by gap repair against the Hck,  
495 Fyn<sub>R96</sub>, and Fyn<sub>R96I</sub> SH3 constructs, and clones displaying differential strength of  $\beta$ -  
496 galactosidase staining and yeast colony outgrowth on selective medium were selected and  
497 sequenced.

498 We found that only ten clones (9 for the screen using Hck and 3 for the Fyn<sub>R96I</sub> SH3  
499 screen, representing 2% and 3% of total clones, respectively) displayed substantially  
500 different affinities when we compared Hck and Fyn<sub>R96I</sub> SH3-mediated interactions with  
501 Fyn<sub>R96</sub>-mediated interactions (**Table 2**). We then used bioinformatic analysis to identify  
502 putative SH3 binding motifs in these sequences (using the ELM database) and to predict the  
503 fragment's secondary structure, solvent exposure and structural disorder (**S4 Fig**).

504 According to our bioinformatic analysis 5/10 clones were predicted to be almost  
505 entirely disordered, and hence cannot produce a tertiary binding site. Two clones showed a  
506 folded helical coiled-coil domain that was followed by a flexible region that contained the  
507 proline-rich motifs (ABI1 and ALIX). However, the proline-rich motifs were separated by 70  
508 residues (ABI1) or 20 residues (ALIX (49)) from the folded part. We previously reported that  
509 ALIX achieves its capability to distinguish between an arginine and isoleucine in the SH3 'R'  
510 positions through a simple 'linear' rather than 3D motif (49,50). Consequently, it is likely that  
511 ABI also achieves this selectivity through a 'linear' mechanism. GFAP is another example of  
512 a proline-rich region attached to the beginning of a (probably homotetrameric) coiled-coil  
513 structure, and might also achieve its selectivity in a linear 'ALIX-like' manner. Finally, only  
514 two clones (ARS2 and HNRPK) harbour PR motifs within or close to a globular folded  
515 protein core. Hence, they might offer a 3D environment that would, at least in principle, be  
516 capable of a tertiary Nef-like SH3 recognition (**Fig 6B**). Collectively, these results strongly  
517 support that only a few cellular ligands can select Src family SH3 domains according to the  
518 same RT-loop residues as does HIV-1 Nef. Yet, in most of these cases, this specificity was  
519 likely to be achieved by a linear binding mode.

520  
521



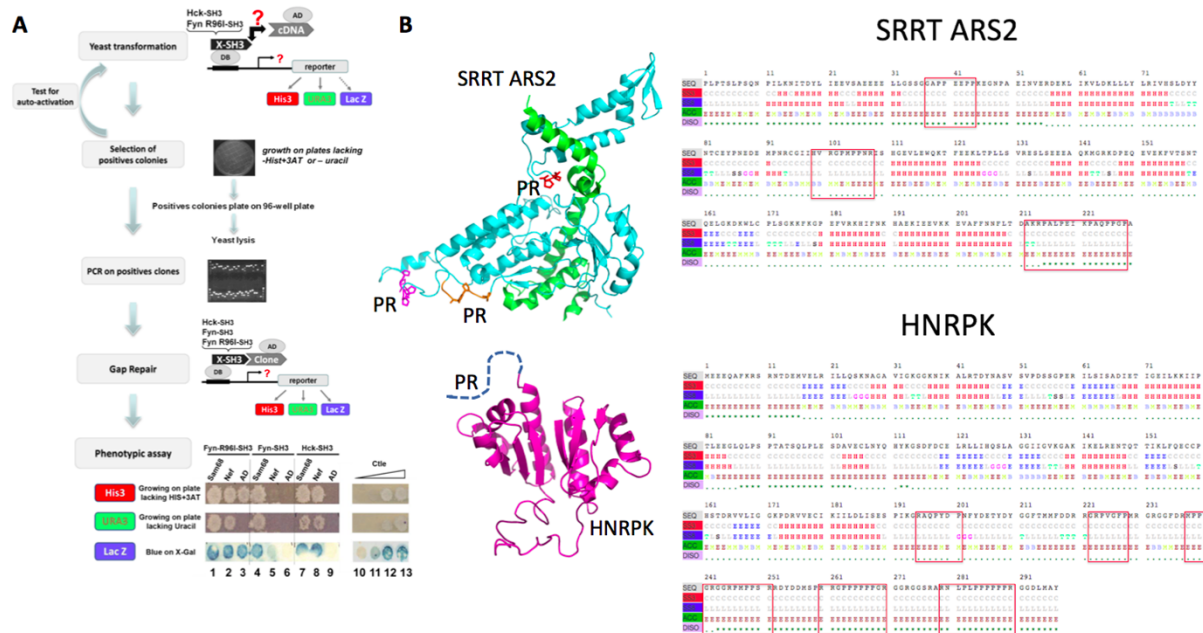

522  
523  
524  
525  
526  
527  
528  
529  
530  
531  
532  
533  
534  
535  
536  
537  
538  
539  
540  
541  
542  
543  
544  
545  
546  
547  
548  
549  
550  
551  
552  
553

**Fig 6. A)** Flow chart of the protocol used to identify proteins displaying differential interaction with Hck-SH3, Fyn<sub>R96I</sub>-SH3, and Fyn<sub>R96I</sub>-SH3 domains. Y2H screens were performed using either Hck-SH3 or Fyn<sub>R96I</sub>-SH3 domains. Positive clones were then tested against each of the Hck-SH3, Fyn(WT)-SH3, and Fyn<sub>R96I</sub>-SH3 domains after gap repair was performed. Binding between the two protein partners was determined by  $\beta$ -galactosidase activity staining (lacZ) and the density of yeast colony outgrowth on medium lacking histidine (HIS3) or uracil (URA3). The strength of the corresponding interactions was evaluated by comparison with signals yielded by various known interactions (lanes 10–13) as described in Materials and Methods in the Supporting Information. Clones encoding for the HIV-1 Nef and SAM68 proteins were included as controls for differential (Nef; lanes 2, 5, and 8) or similar (SAM68; lanes 1, 4, and 7) binding to the different SH3 domains. The empty plasmid AD encoding Gal4 was used as negative control (lanes 3, 6, and 9). Of note, because the Fyn<sub>R96I</sub>-SH3 construct was able to transactivate the lacZ and HIS3 reporters, but not URA3, only the URA3 marker was used to evaluate Fyn<sub>R96I</sub>-SH3-mediated interactions. **B) Left panel:** Homology models of SRRT and HNRPK, showing the predicted proline-rich regions (PR) that may bind to SH3 domains. **Right panel:** Prediction of secondary structure, disorder, solvent exposure and presence of SH3 binding PR motifs (boxed).

554 **Table 2. Clones displaying differential interaction with Hck SH3 (I), Fyn SH3<sub>R96</sub> (R96) and**  
 555 **Fyn<sub>R96I</sub> SH3 (R96I).**

| Clones                  | Gene ID | Amino acids | Hck-SH3 | Fyn <sub>R96I</sub> -SH3 | PxxP | Src binding | References |
|-------------------------|---------|-------------|---------|--------------------------|------|-------------|------------|
| <b>Abl-interactor 1</b> | 10006   | 1-282       | x       |                          | x    | x           | (51–53)    |
| <b>Alix/PDCD6IP</b>     | 10015   | 456-868     | x       | x                        | x    | x           | (49,50)    |
| <b>GFAP</b>             | 2670    | 1-308       | x       |                          | x    | x           |            |
| <b>SRRT/ARS2</b>        | 51593   | 546-774     | x       |                          | x    |             | (54)       |
| <b>HNRPK</b>            | 3190    | 27-323      | x       |                          | x    | x           | (55)       |
| <b>CTAGE5</b>           | 4253    | 81-274      | x       | x                        |      |             |            |
| <b>Ena/VASP-like</b>    | 51466   | 144-278     | x       |                          | x    | x           | (56,57)    |
| <b>FAM59A</b>           | 64762   | 485-872     | x       |                          | x    |             | (58)       |
| <b>RTN3</b>             | 10313   | 1-266       | x       |                          | x    |             |            |
| <b>SMN1</b>             | 6606    | 199-294     |         | x                        | x    |             | (59)       |

556 According to our RaptorX and ELM bioinformatic analysis: proteins that contained a proline-rich motif  
 557 in proximity of a folded helical coiled-coil domain separated by a 20-70 amino acid linker were  
 558 highlighted in light blue, proline-rich motifs close to a globular folded protein core were highlighted in  
 559 light yellow, and proteins that were entirely disordered were highlighted in light red.

560

## 561 Conclusion

562 Despite lacking catalytic activity, SIV and HIV Nef molecules have a remarkably large  
 563 functional range. And just as remarkable is the structural malleability of the flexible regions of  
 564 Nef, which make up about 50% of the Nef sequence. Here, we investigated whether the  
 565 combination of interactions established jointly by Nef's folded core and flexible regions  
 566 create synergy and allostery in ligand binding.

567 Based on our biophysical and structural analysis we propose that the flexible regions  
 568 can adopt at least three different conformational states (state I - III; **Fig 7**). If the N-terminal  
 569 helix H1 is available, then W<sub>57</sub>L and the E<sub>160</sub>xxxLL endocytosis motif are exposed (state I). If  
 570 H1 is engaged (for example with the membrane), then the combined interaction of W57 and  
 571 E<sub>160</sub>xxxLL with the core conceals these motifs (state II). If H1 is not available, and W<sub>57</sub>L is  
 572 engaged or cleaved, then the E<sub>160</sub>xxxLL motif only weakly associates with the core (state III).

573

574

575

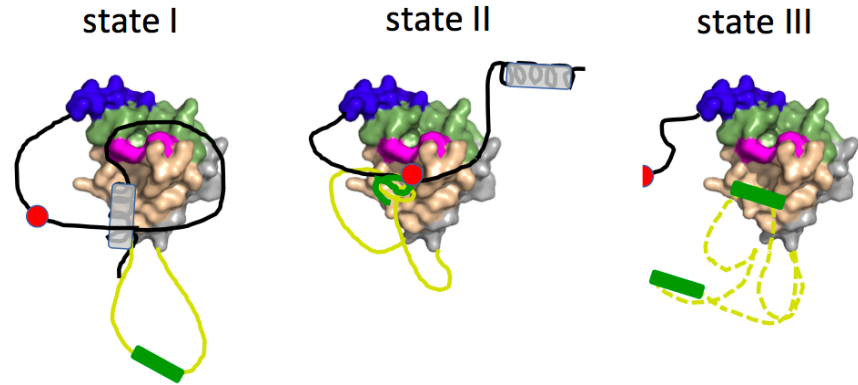

|                                       | state I       | state II    | state III        |
|---------------------------------------|---------------|-------------|------------------|
| <b>SH3 affinity/selectivity('R'):</b> | high/high (I) | low/low (W) | low/low (W)      |
| <b>W57L:</b>                          | exposed       | concealed   | exposed/cleaved  |
| <b>ExxxLL:</b>                        | exposed       | concealed   | partly concealed |
| <b>a1-a2 groove accessibility:</b>    | low           | moderate    | good             |
| <b>H1 binding partner:</b>            | Nef           | membrane    | membrane/cleaved |

576

577

578

579

580

581

582

583

584

585

586

587

588

589

590

591

592

593

594

595

596

597

598

599

600

601

602

603

604

605

606

607

608

609

**Fig 7.** Blue: P<sub>72</sub>xxPxR motif; magenta: the gatekeeper residues W113 and F90; green: residues that are engaged in the tertiary SH3 interaction in addition to the gatekeeper residues. pale brown:  $\alpha$ 1- $\alpha$ 2 groove. The remaining regions of Nef are coloured in grey. black line: N-terminal flexible region. grey helix: H1; yellow line: Nef core loop, containing the E<sub>160</sub>xxxLL motif (green); red sphere: W<sub>57</sub>L motif. The halved red sphere (state III) indicates the presence of only L58 after protease cleavage.

We further demonstrated that there is a cross-talk between the conformation of the flexible regions in the different states and the binding of some, but not all, Nef ligands. We showed that binding of SH3 domains to the tertiary Nef site affects binding of H1 to the  $\alpha$ 1- $\alpha$ 2 groove and *vice versa*. Our analysis supports that this influence results from the combination of a non-specific dynamic coupling (binding of one ligand stabilises the Nef surface for the other ligand), and a steric interference that is specific for the SH3 'R' position. This specific interference results from the size of the 'R' position side chain, and its interaction with the Nef gatekeeper residues. Hence, state I bound most tightly to the SH3 domain that had a mid-sized hydrophobic isoleucine in the 'R' position (such as Hck, Lyn and possibly Blk [where 'R' is a methionine]), discriminating most strongly against SH3 domains with an arginine in this position (case of Fyn, Src, Fgr and Yes). State II and III preferred the SH3 domain with a bulky hydrophobic tryptophan in the 'R' position (as in v-Src), but bound it less tightly and hence with less selectivity compared to wild-type Fyn. Our analysis also corroborated and extended previous findings that the affinity of SH3 domains towards Nef is additionally influenced by the extent of the hydrogen bond network that stabilises the RT loop in the apo-SH3 (27). In particular, we showed that the incorporation of the tryptophan in Fyn<sub>R96W</sub> led to a loss of RT loop hydrogen bonds making it react like Hck. We also showed that state I shielded the Nef  $\alpha$ 1- $\alpha$ 2 groove most strongly from other ligands to this site, however the states and the presence of SH3 domains did not have a measurable effect on the binding of the p85 C-terminal fragment to Nef. Our MD simulations explain this allostery, at least in part, by showing that the tertiary binding of SH3 domains stabilises specific interaction surfaces of Nef, including the one used for H1 binding. Thus, our analysis showed that the combination of a tertiary SH3 binding site with large flexible regions can provide an additional level of regulation of ligand binding. *In vivo*, Nef is myristoylated on its N-terminal glycine Nef (21,60). The presence of this fatty acid chain might further increase the number of conformational states through a myristoyl-switch mechanism and/or contribute to stabilising state I. The cross-talk between the conformational states of Nef and its ligands

610 might help synergising certain subsets of ligands while excluding others, with potential  
611 functional implications for viral replication.

612 Embedded in the available functional and mechanistic data available for Nef, our  
613 findings can be extended to make the following predictions and speculations: Due to the  
614 mutual reinforcement between state I and Fyn<sub>R96I</sub> SH3 domains, this state might be more  
615 predominantly found associated with the Nef function of activating Hck and Lyn. State II  
616 might present a membrane-associated and partly auto-inhibited form, in which concealing  
617 the W<sub>57</sub>L and the endocytosis motif prevents premature down-regulation in absence of CD4  
618 or other surface receptors (e.g. CD3). Once specific ligands bind to the  $\alpha$ 1- $\alpha$ 2 groove, W<sub>57</sub>L  
619 and the endocytosis motif would get exposed to mediate down-regulation in presence of  
620 cargo. State III would represent the conformation obtained after proteolytic cleavage by the  
621 viral protease between W57 and L58 (61). Cleaved Nef is predominantly found inside the  
622 HIV-1 virions. Hence, state III might facilitate tighter packing of Nef molecules within the  
623 virion, but also lead to a Nef molecule being released in infected cells that more  
624 promiscuously binds to SH3 domains and other ligands to the poorly concealed  $\alpha$ 1- $\alpha$ 2  
625 groove.

626 Our findings also raise the possibility of additional subtle allosteric mechanisms. We  
627 noted that the SH3 position 'R' affects the Nef W113 position, which, in turn, might affect  
628 other ligands. For example, SH2-SH3 fragments from Fyn or v-Src would not be able to form  
629 the same dimeric complex with Nef than does Hck SH2-SH3, because of clashes between  
630 Fyn R96 and W113, and/or R96 and Fyn E93 (which is required to bind to R106 of an  
631 adjacent Nef molecule in the dimer). This effect might contribute to the differential outcome  
632 between Nef interactions with either Hck or other Src kinases (24,31). Similarly, the 'R'  
633 position of a bound SH3 domain might favour or disfavour specific ligands to the  $\alpha$ 1- $\alpha$ 2  
634 groove. An additional allosteric regulation mechanism might arise from the stabilising effect  
635 of the SH3 domain on selected Nef regions. Thus, SH3 binding could promote certain Nef  
636 interactions, including some of its self-associations. SH3 binding also stabilises the Nef  
637 region involved in CD4 binding, however, the available structural models for this interaction  
638 show the proline-rich motif of Nef in a conformation incompatible with SH3 binding (37).  
639 Hence, future research needs to establish which ligands, if any, can bind Nef simultaneously  
640 with Src kinases or other SH3-domain containing ligands, such as Tec family kinases (16).

641 Given the versatility and potency of the combination of flexible and folded regions in  
642 Nef's interactions, we then searched for cellular proteins that might display the same  
643 features, as illustrated by the capacity to select SH3 domains. However, our experiments  
644 revealed that only very few cellular SH3-binding proteins distinguish SH3 domains according  
645 to the same RT-loop residue as does Nef. Moreover, our bioinformatic analysis and the  
646 experimentally established example of ALIX show that the RT-loop selectivity of these  
647 cellular proteins does not necessarily require a Nef-like tertiary interaction but can be  
648 obtained through a linear peptide-like binding mode. Thus, our study infers that a Nef-like  
649 tertiary (and possibly allosterically active) SH3 binding mode is not common among cellular  
650 proteins. It is possible that Nef's affinity/selectivity characteristics are intrinsically unsuitable  
651 for mediating SH3 binding in cellular signalling. Indeed, the tertiary recognition mode of Nef  
652 results in strong SH3 binding which not only activates Src kinases that contain a favoured  
653 isoleucine at position 96 (such as Hck or Lyn) but also perturbs the function of those with  
654 less favourable residues (such as Lck, with a serine, or Fyn and Src, with an arginine)  
655 (30,31,62,63). The Nef:SH3 domain binding mode may therefore be too strong, leading to  
656 unfavourable perturbation of several Src kinases, to be widely used in cells. The uniqueness  
657 of the tertiary SH3 binding site of Nef supports it as a selective antiviral drug target.

## 658 **Materials and Methods**

### 659 **Protein production**

#### 660 **Expression of protein constructs.**

661 All Fyn SH3 (Fyn<sub>R96</sub>, Fyn<sub>R96I</sub>, and Fyn<sub>R96W</sub>) and Nef (SF2, LAI, ΔN, ΔNΔL, and WLΔN)  
662 constructs were expressed in *Escherichia coli* BI21 (DE3) cells with a pGEX-2T expression  
663 vector that contains an N-terminal GST tag (Fyn<sub>R96W</sub>; Nef WLΔN) or a pET42a expression  
664 vector that contains a C-terminal hexa-His tag (Fyn<sub>R96</sub> and Fyn<sub>R96I</sub>) or a pET23d expression  
665 vector that contains a C-terminal hexa-HIS tag (SF2). The Nef ΔN, Nef ΔNΔL, and LAI were  
666 expressed with pJEx411c expression vector that contains an N-terminal GST tag. The  
667 bacterial cells were cultured at 37°C in 2xYT broth that contains 100 µg/ml ampicillin (all Fyn  
668 and Nef WLΔN and SF2) or 50 µg/ml kanamycin (Nef ΔN, Nef ΔNΔL, and LAI). Protein  
669 expression was induced with 0.2 mM IPTG (Fyn constructs) or 0.5 mM IPTG (Nef  
670 constructs) when the OD<sub>280</sub> reached 0.6-0.8 and proceeded overnight at 18°C. The cells  
671 were harvested and resuspended in 50 mM Tris (pH=8.0), 200mM NaCl, 2mM EDTA (not  
672 included in His tag purification), 1mM DTT, 1 tablet protease inhibitor (Roche), 1% triton and  
673 0.4 mg/ml lysozyme. Cells were lysed using sonication and were pelleted by centrifugation at  
674 87,207 x g for 45 minutes at 4°C.

675

#### 676 **Purification of protein constructs.**

677 All proteins were purified with HIS-affinity column (Fyn<sub>R96</sub>, Fyn<sub>R96I</sub>, and SF2) or GST-affinity  
678 column using Thrombin cleavage site (Fyn<sub>R96W</sub> and WLΔN) or GST-affinity column using 3C  
679 protease cleavage site (LAI, ΔN, and ΔNΔL) following standard procedures. Proteins were  
680 further purified using mono Q anion exchange chromatography and Superdex75 16/60 (GE  
681 Healthcare) size-exclusion chromatography. Protein purity was then analyzed by SDS-PAGE  
682 gel. The buffer used was 50 mM Tris (pH 8.0), 200 mM NaCl, 2 mM EDTA (Not included for  
683 HIS column), and 1 mM DTT. The protein is dialyzed in the same buffer but with 100 mM  
684 NaCl for the Mono Q column.

685

#### 686 **Crystallisation and structure determination**

687 For initial crystallization experiments of the apo Fyn<sub>R96I</sub> or Fyn<sub>R96W</sub> SH3 domains, the SH3  
688 domains were dialyzed against 20 mM Tris-HCl (pH 8.0), 150 mM NaCl, and 1 mM EGTA  
689 and concentrated by ultrafiltration to 5–8 mg/ml. Crystals were grown by vapor diffusion  
690 (Fyn<sub>R96I</sub>: sitting drop technique at 18 °C; Fyn<sub>R96W</sub>: hanging drop at 4 °C) by mixing 1 µl of  
691 protein solution with 1 µl of well solution (0.2 M ammonium acetate, 0.1 M sodium citrate [pH  
692 5.6], 1.0 M lithium sulfate for Fyn<sub>R96I</sub> [crystal form I]; 0.2 M ammonium acetate, 0.1 M Tris-  
693 HCl [pH 5.6], 30% v/v MPD for Fyn<sub>R96I</sub> [crystal form II]; 2 M ammonium sulfate, 2% PEG 400,  
694 0.1 M Tris [pH 9.1] for Fyn<sub>R96W</sub> SH3). 25% PEG 200 was used as a cryoprotectant for Fyn<sub>R96I</sub>  
695 (crystal form I). Data were recorded at 100 K (Fyn<sub>R96I</sub>) or 295 K (Fyn<sub>R96W</sub>), at λ = 1.54 Å, using  
696 a Rigaku 200 X-ray generator, confocal multilayer mirrors (Osmic), and a MAR300 image  
697 plate detector. Data were integrated, merged, and scaled using Mosflm (64) and Scala (65)  
698 **(S2 Table)**.

699 These structures were determined by molecular replacement using Molrep (66). For  
700 Fyn<sub>R96I</sub> (crystal form I) and Fyn<sub>R96W</sub> SH3, Fyn<sub>R96</sub> SH3 was used as a template (PDB 1SHF)  
701 (43)). Fyn<sub>R96I</sub> (crystal form II) was solved using Fyn<sub>R96I</sub> (form I) as a template. Structures  
702 were refined using Refmac (67) and COOT (68). PDB accession codes are Fyn<sub>R96I</sub>: 3H0H  
703 (crystal form I) and 3H0I (crystal form II); Fyn<sub>R96W</sub>: 3H0F.

704 In a second round of crystallisation experiments, Fyn<sub>R96I</sub> with a C-terminal  
705 hexahistidine tag (see (49) for cloning) crystallized in 0.1 M Citric acid pH 3.5 and 25% w/v  
706 Polyethylene glycol 3,350. Crystals were cryo-protected with 25% glycerol. The best crystal  
707 diffracted to 1.34 Å resolutions at the SOLEIL synchrotron beamline PROXIMA 2A. Fyn<sub>R96W</sub>  
708 SH3 crystallized in 0.08 M sodium acetate trihydrate pH 4.6, 1.6 M Ammonium sulfate, 20%  
709 v/v Glycerol and 50 mM 18-crown-6. Crystals diffracted at best to 1.57 Å resolution at  
710 PROXIMA 2A. The structures were determined using the CCP4 online version of MoRDa  
711 (69), followed by rebuilding through BUCCANEER (70), and manual and automated  
712 (REFMAC5, PHENIX) refinement (71,72). These structures were deposited in the PDB with  
713 the accession number 6IPZ (Fyn<sub>R96W</sub> SH3) and 6IPY (Fyn<sub>R96I</sub> SH3)).

714 Crystals of the HIV-1 LΔN:Fyn<sub>R96W</sub> SH3 complex were obtained by hanging drop  
715 vapor diffusion at 18–20 °C. Before crystallization, stoichiometric amounts of LΔN and  
716 Fyn<sub>R96W</sub> SH3 were mixed, concentrated to obtain 0.35 mM of Nef:SH3 complex, and filtered.  
717 Samples of 1 μl of this solution were mixed with 1 μl of the reservoir buffer containing 0.25–  
718 0.3 M sodium potassium tartrate, 0.5 M bicine buffer (pH 8.4), and 1 critical micelle  
719 concentration β-D-octylglucopyranoside. Cryoprotection was achieved by rapid transfer of  
720 the crystals in a cryosolvent drop containing 28% glycerol, 0.3 M sodium potassium tartrate  
721 and 0.5 M bicine buffer (pH 8.4). The crystals were flash-cooled in liquid nitrogen and data  
722 sets were collected at 100 K at the FIP beamline at the European Synchrotron Radiation  
723 Facility (Grenoble, France) using a MAR345 image plate detector. The images were  
724 processed and scaled with Mosflm (64) and Scala (65). Phases for this crystal were obtained  
725 by molecular replacement using structures of the LΔN:Fyn<sub>R96</sub> SH3 and WLΔN:Fyn<sub>R96I</sub> SH3  
726 complexes as templates (PDB 1AVZ and 1EFN). The structure was refined using Refmac  
727 (71) and Phenix (72) (**S3 Table**) and has been deposited in the PDB with accession code  
728 4d8d.

729 Crystals of the SF2 Nef:Fyn<sub>R96I</sub> SH3 complex were obtained by sitting drop vapour  
730 diffusion at 18–20 °C. Before crystallization, stoichiometric amounts of SF2 Nef and Fyn<sub>R96I</sub>  
731 SH3 were mixed, concentrated to obtain 1 mM of Nef:SH3 complex, and filtered. Samples of  
732 1 μl of this solution were mixed with 1 μl of the reservoir buffer containing 0.10 M calcium  
733 acetate hydrate, 0.10 M sodium acetate buffer (pH 4.5), and 10% w/v PEG 4000.  
734 Cryoprotection was achieved by rapid transfer of the crystals in a cryosolvent drop  
735 containing 28% glycerol, 0.10 M calcium acetate hydrate, 0.10 M sodium acetate buffer (pH  
736 4.5), and 10% w/v PEG 4000. All data for SF2 Nef:Fyn<sub>R96I</sub> SH3 were collected at 100K at the  
737 beamline Proxima 2A at the SOLEIL Synchrotron (France), EIGER 9M detector, respectively  
738 (proposal numbers 2016 0098, 20161236, 20170193). Data from three crystals were  
739 processed, scaled and combined using XDS as implemented in the XDSme pipeline  
740 (unmerged data are available at <https://doi.org/10.25781/KAUST-8CV15>). Due to anisotropic  
741 diffraction, data were merged and anisotropic resolution limits established using  
742 STARANISO (73) (**S3 Table**). The structure was solved by MoRDa (69) using the PDB entry  
743 4d8d as molecular template (Q score 0.834). The structure was manually corrected (COOT)  
744 and refined by LORESTR (74) (Ramachandran outliers/favourite 2.53/91.14%)

745  
746  
747  
748  
749  
750

## 751 **Molecular dynamics simulations**

752 Molecular dynamics simulations in triplicates were carried out for Nef-A and Nef-C, starting  
753 from the experimental structure (PDB ID: 1EFN). MD simulations were carried out using  
754 GROMACS 2018 (75), with AMBER14SB force field (76). Each protein was inserted into a  
755 cubic box filled with TIP3P water molecules, setting a minimum distance of 10.0 Å from the  
756 protein edges to the box sides. The system was neutralized using the solution with Na<sup>+</sup> and  
757 Cl<sup>-</sup> ions. Energy minimization was performed, followed by equilibration using isothermal  
758 ensemble dynamics (NVT) with a velocity-rescale thermostat (77) for computing velocities  
759 and positions of atoms. Further, equilibration of 2 ns with isothermal-isobaric ensemble  
760 dynamics (NPT) was carried out on the structure. Periodic boundary conditions (PBC) were  
761 applied in all X, Y, and Z directions. Final production simulations were carried out using NPT  
762 ensemble for 200 ns in triplicates. The temperature was kept constant at 300K using a  
763 velocity-rescale thermostat (77) ( $\tau_T = 0.1$  ps) and 1 bar pressure was maintained using a  
764 Parrinello-Rahman barostat (78) ( $\tau_P = 2.0$  ps). Electrostatic interactions beyond 12 Å were  
765 evaluated by the Particle-Mesh-Ewald (PME) (79). LINear Constraint Solver algorithm  
766 (LINCS) (80) was used to constrain the bond lengths. Output trajectories were analyzed  
767 using GROMACS 2018 analysis tools and PyMol ([www.pymol.org](http://www.pymol.org)).  
768

## 769 **Microscale thermophoresis (MST)**

770 All proteins were labeled with the Monolith Protein Labeling Kit RED-NHS 2nd Generation.  
771 The labeled protein concentrations ranged from 10-50 nM. The unlabeled proteins were at  
772 least 10 folds higher than the expected  $K_d$ . The measurements were performed at 25-50%  
773 LED power and 40% MST power. Data was analyzed using the analysis program provided  
774 by Nanotemper Technologies. All MST experiments were performed in 50 mM Tris (pH=8.0),  
775 200mM NaCl, 2mM EDTA (not included in HIS tag purification), 1-2mM DTT at room  
776 temperature.  
777

## 778 **Isothermal titration calorimetry (ITC)**

779 All ITC experiments were performed on MicroCal PEAQ-ITC machine by malvern panalytical  
780 (19-injection standard method, 25 °C). All proteins were dialyzed and degassed in 20mM  
781 Sodium phosphate (pH=7.5), 150mM NaCl, 2mM EDTA, 1-2mM TCEP. The protein  
782 concentrations in the cell ranged from 20-75 μM and were 10 folds higher in the syringe. The  
783 measurements and data were analyzed using Analysis Software provided by ITC Origin  
784 program.  
785

## 786 **Yeast Two-Hybrid (Y2H) screen**

787 Y2H screens were performed as reported previously (50).  
788

## 789 **Bioinformatic analysis**

790 The Y2H bioinformatic analysis was performed using the RaptorX for property  
791 prediction/structure prediction and the ELM database for identification of SH3 binding motifs  
792 (81,82).  
793  
794  
795  
796  
797

## 798 Acknowledgements

799 We acknowledge SOLEIL for provision of synchrotron radiation facilities and we would like to  
800 thank L. Chavas, P. Legrand, S. Sirigu and P. Montaville for assistance in using beamline  
801 PROXIMA 1, G. Fox, M. Savko and B. Shepard for assistance in using beamline PROXIMA  
802 2A. We thank M-P. Struband M-T. Augé-Sénégas for the initial cloning of some of the Fyn<sub>R96I</sub>  
803 and Fyn<sub>R96W</sub> mutants. We thank M. Geyer for providing the expression construct of Nef SF2.  
804 We thank the staff of the ESRF beamline BM30 (Grenoble, France) for assistance with  
805 crystallographic data collection. We also thank the KAUST Supercomputing Laboratory  
806 (KSL) for their assistance with computational resources for molecular dynamics simulations  
807 using the IBEX cluster.  
808

## 809 Funding

810 The research reported in this publication was supported by funding from King Abdullah  
811 University of Science and Technology (KAUST) through the baseline fund and the Award  
812 No. FCC/1/1976-25 from the Office of Sponsored Research (OSR). For computer time, this  
813 research used the resources of the Supercomputing Laboratory at King Abdullah University  
814 of Science & Technology (KAUST) in Thuwal, Saudi Arabia. This work was supported by the  
815 Centre National de la Recherche Scientifique (CNRS); the Institut National de la Santé et de  
816 la Recherche Médicale (INSERM); the Agence Nationale de Recherche sur le SIDA et les  
817 hépatites virales (ANRS); the Ministry of Science and Technology, China [grant numbers  
818 2007CB914304; 2006AA02A313]; the National Natural Science Foundation of China (NSFC)  
819 [grant numbers 30800181; 30625011]; the Research Foundation Flanders (FWO); the  
820 concerted action programme of the Katholieke Universiteit Leuven; and the National  
821 Institutes of Health (MD Anderson's Cancer Center Support) [grant number CA016672]. S.O.  
822 and A.L. were fellows of the ANRS, and X.S. was a fellow of the 'Ambassade de France en  
823 Chine'.  
824

## 825 References

- 826 1. Arold ST, Baur AS. Dynamic Nef and Nef dynamics: how structure could explain the  
827 complex activities of this small HIV protein. *Trends in Biochemical Sciences*. 2001  
828 Jun;26(6):356–63.
- 829 2. Kirchhoff F, Schindler M, Specht A, Arhel N, Münch J. Role of Nef in primate lentiviral  
830 immunopathogenesis. *Cell Mol Life Sci*. 2008 Sep;65(17):2621–36.
- 831 3. Kestler HW, Ringler DJ, Mori K, Panicali DL, Sehgal PK, Daniel MD, et al. Importance  
832 of the nef gene for maintenance of high virus loads and for development of AIDS. *Cell*.  
833 1991 May 17;65(4):651–62.
- 834 4. Kirchhoff F, Greenough TC, Brettler DB, Sullivan JL, Desrosiers RC. Absence of Intact  
835 nef Sequences in a Long-Term Survivor with Nonprogressive HIV-1 Infection. *New*  
836 *England Journal of Medicine*. 1995 Jan 26;332(4):228–32.
- 837 5. Deacon NJ, Tsykin A, Solomon A, Smith K, Ludford-Menting M, Hooker DJ, et al.  
838 Genomic structure of an attenuated quasi species of HIV-1 from a blood transfusion  
839 donor and recipients. *Science*. 1995 Nov 10;270(5238):988–91.
- 840 6. Pereira EA, daSilva LLP. HIV-1 Nef: Taking Control of Protein Trafficking. *Traffic*.  
841 2016;17(9):976–96.
- 842 7. Buffalo CZ, Iwamoto Y, Hurley JH, Ren X. How HIV Nef Proteins Hijack Membrane  
843 Traffic To Promote Infection. Pierson TC, editor. *J Virol*. 2019 Oct 2;93(24):e01322-19,  
844 /jvi/93/24/JVI.01322-19.atom.
- 845 8. Lama J, Ware CF. Human Immunodeficiency Virus Type 1 Nef Mediates Sustained  
846 Membrane Expression of Tumor Necrosis Factor and the Related Cytokine LIGHT on  
847 Activated T Cells. *J Virol*. 2000 Oct;74(20):9396–402.



- 848 9. Sol-Foulon N, Moris A, Nobile C, Boccaccio C, Engering A, Abastado J-P, et al. HIV-1  
849 Nef-induced upregulation of DC-SIGN in dendritic cells promotes lymphocyte clustering  
850 and viral spread. *Immunity*. 2002 Jan;16(1):145–55.
- 851 10. Schragger JA, Marsh JW. HIV-1 Nef increases T cell activation in a stimulus-dependent  
852 manner. *Proc Natl Acad Sci U S A*. 1999 Jul 6;96(14):8167–72.
- 853 11. Markle TJ, Philip M, Brockman MA. HIV-1 Nef and T-cell activation: a history of  
854 contradictions. *Future Virol*. 2013 Apr 1;8(4).
- 855 12. Swingler S, Mann A, Jacqu e J, Brichacek B, Sasseville VG, Williams K, et al. HIV-1 Nef  
856 mediates lymphocyte chemotaxis and activation by infected macrophages. *Nat Med*.  
857 1999 Sep;5(9):997–103.
- 858 13. Arora VK, Molina RP, Foster JL, Blakemore JL, Chernoff J, Fredericksen BL, et al.  
859 Lentivirus Nef Specifically Activates Pak2. *J Virol*. 2000 Dec;74(23):11081–7.
- 860 14. Renkema GH, Manninen A, Mann DA, Harris M, Saksela K. Identification of the Nef-  
861 associated kinase as p21-activated kinase 2. *Current Biology*. 1999 Dec 2;9(23):1407–  
862 11.
- 863 15. Briggs SD, Sharkey M, Stevenson M, Smithgall TE. SH3-mediated Hck tyrosine kinase  
864 activation and fibroblast transformation by the Nef protein of HIV-1. *J Biol Chem*. 1997  
865 Jul 18;272(29):17899–902.
- 866 16. Tarafdar S, Poe JA, Smithgall TE. The Accessory Factor Nef Links HIV-1 to Tec/Btk  
867 Kinases in an Src Homology 3 Domain-dependent Manner. *J Biol Chem*. 2014 May  
868 30;289(22):15718–28.
- 869 17. Emert-Sedlak LA, Narute P, Shu ST, Poe JA, Shi H, Yanamala N, et al. Effector kinase  
870 coupling enables high-throughput screens for direct HIV-1 Nef antagonists with  
871 antiretroviral activity. *Chem Biol*. 2013 Jan 24;20(1):82–91.
- 872 18. Wolf D, Witte V, Laffert B, Blume K, Stromer E, Trapp S, et al. HIV-1 Nef associated  
873 PAK and PI3-Kinases stimulate Akt-independent Bad-phosphorylation to induce anti-  
874 apoptotic signals. *Nat Med*. 2001 Nov;7(11):1217–24.
- 875 19. Grzesiek S, Bax A, Hu JS, Kaufman J, Palmer I, Stahl SJ, et al. Refined solution  
876 structure and backbone dynamics of HIV-1 Nef. *Protein Sci*. 1997 Jun;6(6):1248–63.
- 877 20. Lee C-H, Saksela K, Mirza UA, Chait BT, Kuriyan J. Crystal Structure of the Conserved  
878 Core of HIV-1 Nef Complexed with a Src Family SH3 Domain. *Cell*. 1996 Jun  
879 14;85(6):931–42.
- 880 21. Geyer M, Munte CE, Schorr J, Kellner R, Kalbitzer HR. Structure of the anchor-domain  
881 of myristoylated and non-myristoylated HIV-1 Nef protein. *J Mol Biol*. 1999 May  
882 28;289(1):123–38.
- 883 22. Arold S, Franken P, Strub MP, Hoh F, Benichou S, Benarous R, et al. The crystal  
884 structure of HIV-1 Nef protein bound to the Fyn kinase SH3 domain suggests a role for  
885 this complex in altered T cell receptor signaling. *Structure*. 1997 Oct 15;5(10):1361–72.
- 886 23. Bentham M, Mazaleyrat S, Harris M. Role of myristoylation and N-terminal basic  
887 residues in membrane association of the human immunodeficiency virus type 1 Nef  
888 protein. *Journal of General Virology*,. 2006;87(3):563–71.
- 889 24. Alvarado JJ, Tarafdar S, Yeh JI, Smithgall TE. Interaction with the Src homology (SH3-  
890 SH2) region of the Src-family kinase Hck structures the HIV-1 Nef dimer for kinase  
891 activation and effector recruitment. *J Biol Chem*. 2014 Oct 10;289(41):28539–53.
- 892 25. Lee CH, Leung B, Lemmon MA, Zheng J, Cowburn D, Kuriyan J, et al. A single amino  
893 acid in the SH3 domain of Hck determines its high affinity and specificity in binding to  
894 HIV-1 Nef protein. *The EMBO Journal*. 1995 Oct 1;14(20):5006–15.
- 895 26. Collette Y, Arold S, Picard C, Janvier K, Benichou S, Benarous R, et al. HIV-2 and SIV  
896 Nef Proteins Target Different Src Family SH3 Domains than Does HIV-1 Nef because  
897 of a Triple Amino Acid Substitution. *J Biol Chem*. 2000 Feb 11;275(6):4171–6.
- 898 27. Arold S, O'Brien R, Franken P, Strub M-P, Hoh F, Dumas C, et al. RT Loop Flexibility  
899 Enhances the Specificity of Src Family SH3 Domains for HIV-1 Nef. *Biochemistry*.  
900 1998 Oct 1;37(42):14683–91.
- 901 28. Moarefi I, LaFevre-Bernt M, Sicheri F, Huse M, Lee CH, Kuriyan J, et al. Activation of  
902 the Src-family tyrosine kinase Hck by SH3 domain displacement. *Nature*. 1997 Feb

- 903 13;385(6617):650–3.
- 904 29. Lerner EC, Smithgall TE. SH3-dependent stimulation of Src-family kinase  
905 autophosphorylation without tail release from the SH2 domain in vivo. *Nat Struct Biol.*  
906 2002 May;9(5):365–9.
- 907 30. Tribble RP, Emert-Sedlak L, Smithgall TE. HIV-1 Nef Selectively Activates Src Family  
908 Kinases Hck, Lyn, and c-Src through Direct SH3 Domain Interaction. *J Biol Chem.* 2006  
909 Sep 15;281(37):27029–38.
- 910 31. Briggs SD, Lerner EC, Smithgall TE. Affinity of Src family kinase SH3 domains for HIV  
911 Nef in vitro does not predict kinase activation by Nef in vivo. *Biochemistry.* 2000 Jan  
912 25;39(3):489–95.
- 913 32. Hung C-H, Thomas L, Ruby CE, Atkins KM, Morris NP, Knight ZA, et al. HIV-1 Nef  
914 Assembles a Src Family Kinase-ZAP-70/Syk-PI3K Cascade to Downregulate Cell-  
915 Surface MHC-I. *Cell Host & Microbe.* 2007 Apr 19;1(2):121–33.
- 916 33. Lee J-H, Ostalecki C, Zhao Z, Kesti T, Bruns H, Simon B, et al. HIV Activates the  
917 Tyrosine Kinase Hck to Secrete ADAM Protease-Containing Extracellular Vesicles.  
918 *EBioMedicine.* 2018;28:151–61.
- 919 34. Ren X, Park SY, Bonifacino JS, Hurley JH. How HIV-1 Nef hijacks the AP-2 clathrin  
920 adaptor to downregulate CD4. *eLife [Internet].* [cited 2020 Aug 18];3. Available from:  
921 <https://www.ncbi.nlm.nih.gov/pmc/articles/PMC3901399/>
- 922 35. Morris KL, Buffalo CZ, Stürzel CM, Heusinger E, Kirchhoff F, Ren X, et al. HIV-1 Nefs  
923 are cargo-sensitive AP-1 trimerization switches in tetherin downregulation. *Cell.* 2018  
924 Jul 26;174(3):659–671.e14.
- 925 36. Jia X, Singh R, Homann S, Yang H, Guatelli J, Xiong Y. Structural basis of evasion of  
926 cellular adaptive immunity by HIV-1 Nef. *Nat Struct Mol Biol.* 2012 Jul;19(7):701–6.
- 927 37. Kwon Y, Kaake RM, Echeverria I, Suarez M, Karimian Shamsabadi M, Stoneham C, et  
928 al. Structural basis of CD4 downregulation by HIV-1 Nef. *Nat Struct Mol Biol [Internet].*  
929 2020 Jul 27 [cited 2020 Aug 18]; Available from:  
930 <http://www.nature.com/articles/s41594-020-0463-z>
- 931 38. Saksela K, Cheng G, Baltimore D. Proline-rich (PxxP) motifs in HIV-1 Nef bind to SH3  
932 domains of a subset of Src kinases and are required for the enhanced growth of Nef+  
933 viruses but not for down-regulation of CD4. *EMBO J.* 1995 Feb 1;14(3):484–91.
- 934 39. Grzesiek S, Stahl SJ, Wingfield PT, Bax A. The CD4 determinant for downregulation by  
935 HIV-1 Nef directly binds to Nef. Mapping of the Nef binding surface by NMR.  
936 *Biochemistry.* 1996 Aug 13;35(32):10256–61.
- 937 40. Linnemann T, Zheng Y-H, Mandic R, Matija Peterlin B. Interaction between Nef and  
938 Phosphatidylinositol-3-Kinase Leads to Activation of p21-Activated Kinase and  
939 Increased Production of HIV. *Virology.* 2002 Mar 15;294(2):246–55.
- 940 41. Graziani A, Galimi F, Medico E, Cottone E, Gramaglia D, Boccaccio C, et al. The HIV-1  
941 Nef Protein Interferes with Phosphatidylinositol 3-Kinase Activation 1. *J Biol Chem.*  
942 1996 Mar 22;271(12):6590–3.
- 943 42. Kim Y-H, Chang SH, Kwon JH, Rhee SS. HIV-1 Nef Plays an Essential Role in Two  
944 Independent Processes in CD4 Down-regulation: Dissociation of the CD4–  
945 p56lckComplex and Targeting of CD4 to Lysosomes. *Virology.* 1999 Apr  
946 25;257(1):208–19.
- 947 43. Noble ME, Musacchio A, Saraste M, Courtneidge SA, Wierenga RK. Crystal structure  
948 of the SH3 domain in human Fyn; comparison of the three-dimensional structures of  
949 SH3 domains in tyrosine kinases and spectrin. *EMBO J.* 1993 Jul;12(7):2617–24.
- 950 44. Franken P, Arold S, Padilla A, Hoh E, Strub MP, Boyer M, et al. HIV-1 Nef protein:  
951 Purification, crystallizations, and preliminary X-ray diffraction studies. *Protein Science.*  
952 1997;6(12):2681–3.
- 953 45. Breuer S, Schievink SI, Schulte A, Blankenfeldt W, Fackler OT, Geyer M. Molecular  
954 design, functional characterization and structural basis of a protein inhibitor against the  
955 HIV-1 pathogenicity factor Nef. *PLoS ONE.* 2011;6(5):e20033.
- 956 46. Manrique S, Sauter D, Horenkamp FA, Lülff S, Yu H, Hotter D, et al. Endocytic sorting  
957 motif interactions involved in Nef-mediated downmodulation of CD4 and CD3. *Nat*

- 958 Commun [Internet]. 2017 Sep 5 [cited 2020 Aug 18];8. Available from:  
959 <https://www.ncbi.nlm.nih.gov/pmc/articles/PMC5585231/>
- 960 47. Horenkamp FA, Breuer S, Schulte A, Lülfi S, Weyand M, Saksela K, et al. Conformation  
961 of the Dileucine-Based Sorting Motif in HIV-1 Nef Revealed by Intermolecular Domain  
962 Assembly. *Traffic*. 2011;12(7):867–77.
- 963 48. Hochrein JM, Wales TE, Lerner EC, Schiavone AP, Smithgall TE, Engen JR.  
964 Conformational Features of the Full-Length HIV and SIV Nef Proteins Determined by  
965 Mass Spectrometry. *Biochemistry*. 2006 Jun 1;45(25):7733–9.
- 966 49. Shi X, Opi S, Lugari A, Restouin A, Coursindel T, Parrot I, et al. Identification and  
967 biophysical assessment of the molecular recognition mechanisms between the human  
968 haemopoietic cell kinase Src homology domain 3 and ALG-2-interacting protein X.  
969 *Biochem J*. 2010 Oct 1;431(1):93–102.
- 970 50. Shi X, Betzi S, Lugari A, Opi S, Restouin A, Parrot I, et al. Structural recognition  
971 mechanisms between human Src homology domain 3 (SH3) and ALG-2-interacting  
972 protein X (Alix). *FEBS Letters*. 2012 Jun 21;586(13):1759–64.
- 973 51. Shi Y, Alin K, Goff SP. Abl-interactor-1, a novel SH3 protein binding to the carboxy-  
974 terminal portion of the Abl protein, suppresses v-abl transforming activity. *Genes Dev*.  
975 1995 Nov 1;9(21):2583–97.
- 976 52. Rickles RJ, Botfield MC, Weng Z, Taylor JA, Green OM, Brugge JS, et al. Identification  
977 of Src, Fyn, Lyn, PI3K and Abl SH3 domain ligands using phage display libraries. *The*  
978 *EMBO Journal*. 1994 Dec 1;13(23):5598–604.
- 979 53. Sparks AB, Rider JE, Hoffman NG, Fowlkes DM, Quillam LA, Kay BK. Distinct ligand  
980 preferences of Src homology 3 domains from Src, Yes, Abl, Cortactin, p53bp2,  
981 PLCgamma, Crk, and Grb2. *PNAS*. 1996 Feb 20;93(4):1540–4.
- 982 54. Thalappilly S, Suliman M, Gayet O, Soubeyran P, Hermant A, Lecine P, et al.  
983 Identification of multi-SH3 domain-containing protein interactome in pancreatic cancer:  
984 A yeast two-hybrid approach. *PROTEOMICS*. 2008;8(15):3071–81.
- 985 55. Lu J, Gao F-H. Role and molecular mechanism of heterogeneous nuclear  
986 ribonucleoprotein K in tumor development and progression (Review). *Biomedical*  
987 *Reports*. 2016 Jun 1;4(6):657–63.
- 988 56. Reinhard M, Jarchau T, Walter U. Actin-based motility: stop and go with Ena/VASP  
989 proteins. *Trends in Biochemical Sciences*. 2001 Apr 1;26(4):243–9.
- 990 57. Kwiatkowski AV, Gertler FB, Loureiro JJ. Function and regulation of Ena/VASP  
991 proteins. *Trends in Cell Biology*. 2003 Jul 1;13(7):386–92.
- 992 58. Tashiro K, Tsunematsu T, Okubo H, Ohta T, Sano E, Yamauchi E, et al. GAREM, a  
993 Novel Adaptor Protein for Growth Factor Receptor-bound Protein 2, Contributes to  
994 Cellular Transformation through the Activation of Extracellular Signal-regulated Kinase  
995 Signaling. *J Biol Chem*. 2009 Jul 24;284(30):20206–14.
- 996 59. Kurihara N, Menaa C, Maeda H, Haile DJ, Reddy SV. Osteoclast-stimulating factor  
997 interacts with the spinal muscular atrophy gene product to stimulate osteoclast  
998 formation. *J Biol Chem*. 2001 Nov 2;276(44):41035–9.
- 999 60. Gerlach H, Laumann V, Martens S, Becker CFW, Goody RS, Geyer M. HIV-1 Nef  
1000 membrane association depends on charge, curvature, composition and sequence. *Nat*  
1001 *Chem Biol*. 2010 Jan;6(1):46–53.
- 1002 61. Chen Y-L, Trono D, Camaur D. The Proteolytic Cleavage of Human Immunodeficiency  
1003 Virus Type 1 Nef Does Not Correlate with Its Ability To Stimulate Virion Infectivity.  
1004 *Journal of Virology*. 1998 Apr 1;72(4):3178–84.
- 1005 62. Collette Y, Dutartre H, Benziane A, Ramos-Morales F, Benarous R, Harris M, et al.  
1006 Physical and Functional Interaction of Nef with Lck HIV-1 Nef-INDUCED T-CELL  
1007 SIGNALING DEFECTS. *J Biol Chem*. 1996 Mar 15;271(11):6333–41.
- 1008 63. Greenway AL, Dutartre H, Allen K, McPhee DA, Olive D, Collette Y. Simian  
1009 Immunodeficiency Virus and Human Immunodeficiency Virus Type 1 Nef Proteins  
1010 Show Distinct Patterns and Mechanisms of Src Kinase Activation. *Journal of Virology*.  
1011 1999 Jul 1;73(7):6152–8.
- 1012 64. Leslie AGW. Recent changes to the MOSFLM package for processing film and image

- 1013 plate data. CCP4 and ESF-EACMB Newsletter on Protein Crystallography [Internet].  
1014 1992 [cited 2020 Sep 11]; Available from: <https://ci.nii.ac.jp/naid/10020054202/>
- 1015 65. Collaborative Computational Project, Number 4. The CCP4 suite: programs for protein  
1016 crystallography. *Acta Crystallogr D Biol Crystallogr*. 1994 Sep 1;50(Pt 5):760–3.
- 1017 66. Vagin A, Teplyakov A. MOLREP: an Automated Program for Molecular Replacement. *J*  
1018 *Appl Cryst*. 1997 Dec 1;30(6):1022–5.
- 1019 67. Murshudov GN, Vagin AA, Dodson EJ. Refinement of Macromolecular Structures by  
1020 the Maximum-Likelihood Method. *Acta Cryst D*. 1997 May 1;53(3):240–55.
- 1021 68. Emsley P, Cowtan K. Coot: model-building tools for molecular graphics. *Acta Cryst D*.  
1022 2004 Dec 1;60(12):2126–32.
- 1023 69. Vagin A, Lebedev A. MoRDa, an automatic molecular replacement pipeline [Internet].  
1024 Vol. 71, *Acta Crystallographica Section A: Foundations and Advances*. International  
1025 Union of Crystallography; 2015 [cited 2020 Sep 11]. p. s19–s19. Available from:  
1026 <https://scripts.iucr.org/cgi-bin/paper?a53232>
- 1027 70. Cowtan K. The Buccaneer software for automated model building. 1. Tracing protein  
1028 chains. *Acta Cryst D*. 2006 Sep 1;62(9):1002–11.
- 1029 71. Murshudov GN, Skubák P, Lebedev AA, Pannu NS, Steiner RA, Nicholls RA, et al.  
1030 REFMAC5 for the refinement of macromolecular crystal structures. *Acta Cryst D*. 2011  
1031 Apr 1;67(4):355–67.
- 1032 72. DiMaio F, Echols N, Headd JJ, Terwilliger TC, Adams PD, Baker D. Improved low-  
1033 resolution crystallographic refinement with Phenix and Rosetta. *Nature Methods*. 2013  
1034 Nov;10(11):1102–4.
- 1035 73. Vonrhein C, Tickle IJ, Flensburg C, Keller P, Paciorek W, Sharff A, et al. Advances in  
1036 automated data analysis and processing within autoPROC, combined with improved  
1037 characterisation, mitigation and visualisation of the anisotropy of diffraction limits using  
1038 STARANISO [Internet]. Vol. 74, *Acta Crystallographica Section A: Foundations and*  
1039 *Advances*. International Union of Crystallography; 2018 [cited 2020 Sep 11]. p. a360–  
1040 a360. Available from: <https://scripts.iucr.org/cgi-bin/paper?S010876731809640X>
- 1041 74. Kovalevskiy O, Nicholls RA, Murshudov GN. Automated refinement of macromolecular  
1042 structures at low resolution using prior information. *Acta Cryst D*. 2016 Oct  
1043 1;72(10):1149–61.
- 1044 75. Abraham MJ, Murtola T, Schulz R, Páll S, Smith JC, Hess B, et al. GROMACS: High  
1045 performance molecular simulations through multi-level parallelism from laptops to  
1046 supercomputers. *SoftwareX*. 2015 Sep 1;1–2:19–25.
- 1047 76. Maier JA, Martinez C, Kasavajhala K, Wickstrom L, Hauser KE, Simmerling C. ff14SB:  
1048 Improving the Accuracy of Protein Side Chain and Backbone Parameters from ff99SB.  
1049 *J Chem Theory Comput*. 2015 Aug 11;11(8):3696–713.
- 1050 77. Bussi G, Donadio D, Parrinello M. Canonical sampling through velocity rescaling. *J*  
1051 *Chem Phys*. 2007 Jan 3;126(1):014101.
- 1052 78. Parrinello M, Rahman A. Polymorphic transitions in single crystals: A new molecular  
1053 dynamics method. *Journal of Applied Physics*. 1981 Dec 1;52(12):7182–90.
- 1054 79. Essmann U, Perera L, Berkowitz ML, Darden T, Lee H, Pedersen LG. A smooth  
1055 particle mesh Ewald method. *J Chem Phys*. 1995 Nov 15;103(19):8577–93.
- 1056 80. Hess B, Bekker H, Berendsen HJC, Fraaije JGEM. LINCS: A linear constraint solver for  
1057 molecular simulations. *Journal of Computational Chemistry*. 1997;18(12):1463–72.
- 1058 81. Källberg M, Wang H, Wang S, Peng J, Wang Z, Lu H, et al. Template-based protein  
1059 structure modeling using the RaptorX web server. *Nature Protocols*. 2012  
1060 Aug;7(8):1511–22.
- 1061 82. Kumar M, Gouw M, Michael S, Sámano-Sánchez H, Pancsa R, Glavina J, et al. ELM—  
1062 the eukaryotic linear motif resource in 2020. *Nucleic Acids Res*. 2020 Jan  
1063 8;48(D1):D296–306.
- 1064  
1065  
1066

## 1067 Supporting information

1068

1069 **Fig 1.** Schematic overview of the constructs used. **A)** Schematic drawing of Nef constructs used  
1070 where key residues such as W<sub>57</sub>L and the proline rich region (PR, including the P<sub>72</sub>xxPxR motif), are  
1071 shown. **B)** Sequence alignment between Nef LAI/SF2 where key motifs discussed in the paper are  
1072 highlighted: H1 (brown), W<sub>57</sub>L (orange), PR (green),  $\alpha$ 1- $\alpha$ 2 (blue), and E<sub>160</sub>xxxLL endocytosis motif  
1073 (purple). **C)** Sequence alignment of all SH3 domains discussed. The RT loop (black) and the 'R'  
1074 position within (red) are highlighted. In both sequence alignments, residues with similar physico-  
1075 chemical properties are written with black bold letters on yellow background. Conserved residues are  
1076 highlighted in red.

1077

1078 **Fig 2.** Influence of Nef's flexible regions on inter- and intramolecular interactions. MST data were  
1079 collected at room temperature. Nef was labeled and used at a fixed concentration of 10-50 nM. 50  $\mu$ M  
1080 SH3 domains were mixed with labelled Nef before adding the H1 or nicSH2.

1081

1082 **Fig 3. A)** Average C $\alpha$  RMSD values as a function of time for Nef-A and Nef-C. **B)** Average CaRMSF  
1083 values vs residue numbers for Nef-A and Nef-C. **C)** Average Lennard-Jones and **D)** Coulombic  
1084 components of the interaction energy monitored over time in Nef-A and Nef-C. **E)** B-factors showing  
1085  $\Delta$ RMSF between Nef-A and Nef-C from 50-200 ns on the 3D structure. The gradient scale shows  
1086 least fluctuating regions in blue and more fluctuating regions in red. SH3 domain is shown in black,  
1087 CD4 is shown in magenta and H1 is shown in gray. **F)** Residual electron density in 1EFN was used to  
1088 propose a speculative model for concerted back-binding of W<sub>57</sub>L (red) and E<sub>160</sub>xxxLL (green) into the  
1089  $\alpha$ 1- $\alpha$ 2 groove. The initial model (grey) is superimposed onto structures obtained in MD simulations at  
1090 170 - 200 ns (coloured magenta to dark magenta). I96 is highlighted in yellow. **G) (Left)**  
1091 Representative snapshots of every 10 ns for the 3D structure of Nef-apo and **(Right)** 3D structure of  
1092 Nef:SH3 complex. Nef-A and Nef-C used for structural analysis using molecular dynamics are marked  
1093 showing stable conformation over the course of simulation.

1094

1095 **Fig 4.** Crystal structures of the Nef core:Fyn SH3 complexes (left) and of the SH3 domain RT loop  
1096 (right) are shown. The Nef P<sub>72</sub>xxPxR (blue) and tertiary regions (green) are shown on the Nef  
1097 surface. **A).** Global view of the  $\Delta$ N:Fyn<sub>R96</sub> SH3 complex (PDB 1AVZ). **B-D)** Expanded views of the  
1098 tertiary interaction between SH3 residue 96 and the cognate Nef core pocket. (B)  $\Delta$ N:Fyn<sub>R96</sub> (1AVZ),  
1099 **C)** WL $\Delta$ N:Fyn<sub>R96I</sub> (1EFN), and **D)**  $\Delta$ N:Fyn<sub>R96W</sub> (4D8D). **E):** RT loop hydrogen bond network of  
1100 unliganded SH3 domains. Hydrogen bonds are indicated by dotted lines. Those shown in dark black  
1101 need to be broken upon binding to Nef core. Hydrogen bonds shown in magenta are preserved in the  
1102 Nef core:SH3 complex. For Hck SH3, preserved and broken hydrogen bonds were evaluated from a  
1103 computationally docked  $\Delta$ N:Hck SH3 complex (22). Fyn<sub>R96W</sub> SH3, but not Fyn<sub>R96I</sub> SH3, shows a Hck  
1104 SH3-like reduced RT loop hydrogen bond network. PDB accession numbers are Hck:1BU1;  
1105 Fyn<sub>R96I</sub>:1SHF; Fyn<sub>R96I</sub>:3H0I and 6IPY; Fyn<sub>R96W</sub>:6IPZ.

1106

1107 **Fig 5. A)** Superimposed Nef structures (1AVZ; cyan)(1efn; violet purple)(4D8D; orange)(3RBB;  
1108 white)(4U5W; dark blue). **B)** Overlay of Nef LAI "gatekeeper" residues W113/F90 in relation to SH3  
1109 position 96 complexes showing Nef bound to Fyn<sub>R96</sub> (1AVZ; cyan), Fyn<sub>R96I</sub> (1EFN; violet purple) and  
1110 Fyn<sub>R96W</sub> (4D8D; orange). **C-D)** Overlap of Nef LAI "gatekeeper" residues bound to H1 (4EN2; grey).

1111

1112 **Fig 6. A)** Flow chart of the protocol used to identify proteins displaying differential interaction with  
1113 Hck-SH3, Fyn<sub>R96I</sub>-SH3, and Fyn<sub>R96I</sub>-SH3 domains. Y2H screens were performed using either Hck-SH3  
1114 or Fyn<sub>R96I</sub>-SH3 domains. Positive clones were then tested against each of the Hck-SH3, Fyn(WT)-  
1115 SH3, and Fyn<sub>R96I</sub>-SH3 domains after gap repair was performed. Binding between the two protein

1116 partners was determined by  $\beta$ -galactosidase activity staining (lacZ) and the density of yeast colony  
1117 outgrowth on medium lacking histidine (HIS3) or uracil (URA3). The strength of the corresponding  
1118 interactions was evaluated by comparison with signals yielded by various known interactions (lanes  
1119 10–13) as described in Materials and Methods in the Supporting Information. Clones encoding for the  
1120 HIV-1 Nef and SAM68 proteins were included as controls for differential (Nef; lanes 2, 5, and 8) or  
1121 similar (SAM68; lanes 1, 4, and 7) binding to the different SH3 domains. The empty plasmid AD  
1122 encoding Gal4 was used as negative control (lanes 3, 6, and 9). Of note, because the Fyn<sub>R96I</sub>-SH3  
1123 construct was able to transactivate the lacZ and HIS3 reporters, but not URA3, only the URA3 marker  
1124 was used to evaluate Fyn<sub>R96I</sub>-SH3- mediated interactions. **B) Left panel:** Homology models of SRRT  
1125 and HNRPK, showing the predicted proline-rich regions (PR) that may bind to SH3 domains. *Right*  
1126 *panel:* Prediction of secondary structure, disorder, solvent exposure and presence of SH3 binding PR  
1127 motifs (boxed).

1128  
1129 **Fig 7.** Blue: P<sub>72</sub>xxPxR motif; magenta: the gatekeeper residues W113 and F90; green: residues that  
1130 are engaged in the tertiary SH3 interaction in addition to the gatekeeper residues. pale brown:  $\alpha$ 1- $\alpha$ 2  
1131 groove. The remaining regions of Nef are coloured in grey. black line: N-terminal flexible region. grey  
1132 helix: H1; yellow line: Nef core loop, containing the E<sub>160</sub>xxxLL motif (green); red sphere: W<sub>57</sub>L motif.  
1133 The halved red sphere (state III) indicates the presence of only L58 after protease cleavage.

1134
